# Supplementary material for: Multiomic analysis of a dried single-drop plasma sample using an integrated mass spectrometry approach
Source: Royal Society of Chemistry journal article supplement (doi:10.1039/d0an01149e), 2020-01-01
Supplement: d0an01149e2.xlsx [file d0an01149e2.xlsx]

## Sheet: Identification
No.	Gene Names	Protein Names	Majority Protein IDs	Biomarker approved by FDA	Reported concentration in Plasma (log10 pg/ml)*	Identified by multi-omi-SISPROT in DDA mode	Ientified by multi-omi-SISPROT in MRM mode
1	Apolipoprotein C-IV	APOC4	P55056		9.36	detected
2	Serum albumin	ALB	P02768	+	9.2	detected
3	Serotransferrin	TF	P02787	+	9.14	detected
4	Complement C3;Complement C3 beta chain;C3-beta-c;Complement C3 alpha chain;C3a anaphylatoxin;Acylation stimulating protein;Complement C3b alpha chain;Complement C3c alpha chain fragment 1;Complement C3dg fragment;Complement C3g fragment;Complement C3d fragment;Complement C3f fragment;Complement C3c alpha chain fragment 2	C3	P01024	+	9.05	detected
5	Alpha-2-macroglobulin	A2M	P01023	+	9.03	detected
6	Fibrinogen alpha chain;Fibrinopeptide A;Fibrinogen alpha chain	FGA	P02671	+	9.01	detected
7	Apolipoprotein A-I;Proapolipoprotein A-I;Truncated apolipoprotein A-I	APOA1	P02647	+	9	detected
8	Haptoglobin;Haptoglobin alpha chain;Haptoglobin beta chain	HP	P00738	+	8.86	detected
9	Retinol-binding protein 4;Plasma retinol-binding protein(1-182);Plasma retinol-binding protein(1-181);Plasma retinol-binding protein(1-179);Plasma retinol-binding protein(1-176)	RBP4	P02753	+	8.76	detected
10	Kininogen-1;Kininogen-1 heavy chain;T-kinin;Bradykinin;Lysyl-bradykinin;Kininogen-1 light chain;Low molecular weight growth-promoting factor	KNG1	P01042		8.62	detected
11	Alpha-1-acid glycoprotein 2	ORM2	P19652	+	8.62
12	Plasma serine protease inhibitor	SERPINA5	P05154		8.57
13	Transthyretin	TTR	P02766	+	8.56	detected
14	Hemopexin	HPX	P02790	+	8.56	detected
15	Lactotransferrin;Lactoferricin-H;Kaliocin-1;Lactoferroxin-A;Lactoferroxin-B;Lactoferroxin-C	LTF	P02788		8.56
16	Fibrinogen beta chain;Fibrinopeptide B;Fibrinogen beta chain	FGB	P02675	+	8.54	detected
17	Ig gamma-4 chain C region	IGHG4	P01861		8.51	detected
18	Apolipoprotein A-II;Proapolipoprotein A-II;Truncated apolipoprotein A-II	APOA2	P02652		8.49	detected	detected
19	Apolipoprotein B-100;Apolipoprotein B-48	APOB	P04114	+	8.48	detected
20	Fibrinogen gamma chain	FGG	P02679	+	8.43	detected
21	Alpha-1-antitrypsin;Short peptide from AAT	SERPINA1	P01009	+	8.39
22	Apolipoprotein C-II	APOC2	P02655		8.38
23	Gelsolin	GSN	P06396		8.25	detected
24	Ceruloplasmin	CP	P00450	+	8.23	detected
25	Ig mu chain C region;Ig mu heavy chain disease protein	IGHM	P01871		8.23
26	Complement C4-A;Complement C4 beta chain;Complement C4-A alpha chain;C4a anaphylatoxin;C4b-A;C4d-A;Complement C4 gamma chain	C4A	B0V2C8		8.23
27	Alpha-1-acid glycoprotein 1	ORM1	P02763	+	8.22	detected
28	Plasma protease C1 inhibitor	SERPING1	P05155	+	8.14	detected
29	Complement C4-B;Complement C4 beta chain;Complement C4-B alpha chain;C4a anaphylatoxin;C4b-B;C4d-B;Complement C4 gamma chain;Complement C4-A;Complement C4 beta chain;Complement C4-A alpha chain;C4a anaphylatoxin;C4b-A;C4d-A;Complement C4 gamma chain	C4B;C4A	P0C0L5	+	8.13	detected
30	Afamin	AFM	P43652		8.12	detected
31	Alpha-1-antichymotrypsin;Alpha-1-antichymotrypsin His-Pro-less	SERPINA3;GAA	P01011		8.04	detected
32		SERPINA3	G3V3A0		8.04
33	Apolipoprotein A-IV	APOA4	P06727		8	detected
34	Complement C4-B;Complement C4 beta chain;Complement C4-B alpha chain;C4a anaphylatoxin;C4b-B;C4d-B;Complement C4 gamma chain	C4B	A2BHY4		7.99
35	Antithrombin-III	SERPINC1	P01008	+	7.97	detected
36	Alpha-1B-glycoprotein	A1BG	P04217		7.96	detected
37	Clusterin;Clusterin beta chain;Clusterin alpha chain;Clusterin	CLU	P10909		7.95	detected
38	Beta-2-glycoprotein 1	APOH	P02749		7.93	detected
39	Apolipoprotein D	APOD	C9JF17		7.91	detected
40	Histidine-rich glycoprotein	HRG	P04196		7.91	detected
41	Alpha-2-HS-glycoprotein;Alpha-2-HS-glycoprotein chain A;Alpha-2-HS-glycoprotein chain B	AHSG	P02765	+	7.91	detected
42	Vitamin D-binding protein	GC	D6RF35		7.78
43	Apolipoprotein C-III	APOC3	P02656		7.76	detected
44	Tetranectin	CLEC3B	E9PHK0		7.76	detected
45	Complement factor H-related protein 1	CFHR1	B1AKG0		7.76	detected
46	Complement factor H-related protein 2	CFHR2	P36980		7.76
47	Alpha-2-antiplasmin	SERPINF2	P08697	+	7.74	detected
48	Plasminogen;Plasmin heavy chain A;Activation peptide;Angiostatin;Plasmin heavy chain A, short form;Plasmin light chain B	PLG	P00747	+	7.74	detected
49	Zinc-alpha-2-glycoprotein	AZGP1	P25311		7.7
50	Protein AMBP;Alpha-1-microglobulin;Inter-alpha-trypsin inhibitor light chain;Trypstatin	AMBP	P02760		7.68	detected
51	Intercellular adhesion molecule 1	ICAM1	P05362		7.66
52	Vitronectin;Vitronectin V65 subunit;Vitronectin V10 subunit;Somatomedin-B	VTN	P04004		7.65	detected
53	Fibronectin;Anastellin;Ugl-Y1;Ugl-Y2;Ugl-Y3	FN1	P02751	+	7.64	detected
54	Inter-alpha-trypsin inhibitor heavy chain H4;70 kDa inter-alpha-trypsin inhibitor heavy chain H4;35 kDa inter-alpha-trypsin inhibitor heavy chain H4	ITIH4	Q14624		7.62	detected
55	Complement factor H	CFH	P08603		7.62	detected
56	Hemoglobin subunit alpha	HBA1;HBA2	P69905		7.61	detected
57	Haptoglobin-related protein	HPR	P00739		7.61	detected
58	Heparin cofactor 2	SERPIND1	P05546		7.55	detected
59	Complement C2;Complement C2b fragment;Complement C2a fragment	C2	P06681		7.54	detected
60	Pregnancy zone protein	PZP	P20742		7.49
61	Hemoglobin subunit beta;LVV-hemorphin-7;Spinorphin	HBB	P68871		7.48	detected
62	Serum amyloid A-4 protein	SAA4	P35542		7.48	detected
63	Hemoglobin subunit delta	HBD	P02042		7.48
64	Vimentin	VIM	P08670		7.45
65	Inter-alpha-trypsin inhibitor heavy chain H1	ITIH1	P19827		7.38	detected
66	Angiotensinogen;Angiotensin-1;Angiotensin-2;Angiotensin-3;Angiotensin-4;Angiotensin 1-9;Angiotensin 1-7;Angiotensin 1-5;Angiotensin 1-4	AGT	P01019		7.36	detected
67	Glutathione peroxidase 3	GPX3	P22352		7.35
68	Inter-alpha-trypsin inhibitor heavy chain H2	ITIH2	P19823		7.32	detected
69	Coagulation factor XIII A chain	F13A1	P00488	+	7.26	detected
70	Platelet glycoprotein V	GP5	P40197		7.24
71	Fibulin-1	FBLN1	P23142		7.23	detected
72	Apolipoprotein E	APOE	P02649		7.22	detected
73	Apolipoprotein C-I;Truncated apolipoprotein C-I	APOC1	P02654		7.18
74	Coagulation factor XIII B chain	F13B	P05160	+	7.16
75	N-acetylmuramoyl-L-alanine amidase	PGLYRP2	Q96PD5		7.15	detected
76	Vitamin K-dependent protein S	PROS1	P07225	+	7.14	detected
77	Prothrombin;Activation peptide fragment 1;Activation peptide fragment 2;Thrombin light chain;Thrombin heavy chain	F2	P00734		7.09	detected
78	Prostaglandin-H2 D-isomerase	PTGDS	P41222		7.08
79	Kallistatin	SERPINA4	P29622		7.06	detected
80	C4b-binding protein alpha chain	C4BPA	P04003		7.04	detected
81	Apolipoprotein F	APOF	Q13790		7.04
82	Complement component C9;Complement component C9a;Complement component C9b	C9	P02748		6.98	detected
83	Coagulation factor XII;Coagulation factor XIIa heavy chain;Beta-factor XIIa part 1;Beta-factor XIIa part 2;Coagulation factor XIIa light chain	F12	P00748		6.98	detected
84	Dipeptidyl peptidase 1;Dipeptidyl peptidase 1 exclusion domain chain;Dipeptidyl peptidase 1 heavy chain;Dipeptidyl peptidase 1 light chain	CTSC	P53634		6.89
85	Serum paraoxonase/arylesterase 1	PON1	P27169		6.89	detected
86	Pigment epithelium-derived factor	SERPINF1	P36955		6.81	detected
87	Immunoglobulin J chain	IGJ	P01591		6.75	detected
88	CD5 antigen-like	CD5L	O43866		6.75	detected
89	Serum amyloid A-2 protein	SAA2	P0DJI9		6.74	detected
90	Prolow-density lipoprotein receptor-related protein 1;Low-density lipoprotein receptor-related protein 1 85 kDa subunit;Low-density lipoprotein receptor-related protein 1 515 kDa subunit;Low-density lipoprotein receptor-related protein 1 intracellular domain	LRP1	Q07954		6.73
91	von Willebrand factor;von Willebrand antigen 2	VWF	P04275	+	6.72
92	Complement C1s subcomponent;Complement C1s subcomponent heavy chain;Complement C1s subcomponent light chain	C1S	P09871	+	6.72	detected
93	Serum amyloid P-component;Serum amyloid P-component(1-203)	APCS	P02743		6.7	detected
94	Cystatin-C	CST3	P01034	+	6.68
95	Complement C1r subcomponent;Complement C1r subcomponent heavy chain;Complement C1r subcomponent light chain	C1R	P00736	+	6.63	detected
96	Coagulation factor V;Coagulation factor V heavy chain;Coagulation factor V light chain	F5	P12259		6.62
97	Lumican	LUM	P51884		6.6	detected
98	Serum amyloid A-1 protein;Amyloid protein A;Serum amyloid protein A(2-104);Serum amyloid protein A(3-104);Serum amyloid protein A(2-103);Serum amyloid protein A(2-102);Serum amyloid protein A(4-101);Serum amyloid A protein	SAA1	P0DJI8		6.59	detected
99	Complement component C6	C6	P13671		6.57	detected
100	Adiponectin	ADIPOQ	Q15848		6.56
101	Platelet basic protein;Connective tissue-activating peptide III;TC-2;Connective tissue-activating peptide III(1-81);Beta-thromboglobulin;Neutrophil-activating peptide 2(74);Neutrophil-activating peptide 2(73);Neutrophil-activating peptide 2;TC-1;Neutrophil-activating peptide 2(1-66);Neutrophil-activating peptide 2(1-63)	PPBP	P02775	+	6.55	detected
102	Insulin-like growth factor-binding protein 3	IGFBP3	P17936	+	6.53	detected
103	Vitamin K-dependent protein Z	PROZ	P22891		6.52
104	Insulin-like growth factor-binding protein 4	IGFBP4	P22692		6.51
105	Beta-2-microglobulin;Beta-2-microglobulin form pI 5.3	B2M	P61769	+	6.49
106	Complement component C8 beta chain	C8B	P07358		6.45	detected
107	Mannan-binding lectin serine protease 2;Mannan-binding lectin serine protease 2 A chain;Mannan-binding lectin serine protease 2 B chain	MASP2	O00187		6.45
108	Leucine-rich alpha-2-glycoprotein	LRG1	P02750		6.43	detected
109	Plasma kallikrein;Plasma kallikrein heavy chain;Plasma kallikrein light chain	KLKB1	P03952		6.41	detected
110	Complement component C7	C7	P10643		6.41	detected
111	Complement factor D	CFD	P00746		6.4	detected
112	Complement component C8 alpha chain	C8A	P07357		6.38	detected
113	C-reactive protein;C-reactive protein(1-205)	CRP	P02741	+	6.33	detected
114	Inter-alpha-trypsin inhibitor heavy chain H3	ITIH3	Q06033		6.3
115	Carboxypeptidase N subunit 2	CPN2	P22792		6.3	detected
116	Protein S100-A9	S100A9	P06702		6.28
117	Ficolin-1	FCN1	O00602		6.28
118	Thymosin beta-4;Hematopoietic system regulatory peptide	TMSB4X;TMSB4XP4	P62328		6.26
119	Insulin-like growth factor-binding protein 5	IGFBP5	P24593		6.23
120	Insulin-like growth factor-binding protein complex acid labile subunit	IGFALS	P35858		6.18	detected
121	Apolipoprotein M	APOM	O95445		6.18	detected
122	Cholesteryl ester transfer protein	CETP	P11597		6.18
123	Thyroxine-binding globulin	SERPINA7	P05543	+	6.11
124	Complement factor B;Complement factor B Ba fragment;Complement factor B Bb fragment	CFB	B4E1Z4	+	6.1	detected
125	Corticosteroid-binding globulin	SERPINA6	P08185		6.08	detected
126	Apolipoprotein L1	APOL1	O14791		6.08	detected
127	Complement C1q subcomponent subunit A	C1QA	P02745	+	6.08
128	Cartilage oligomeric matrix protein	COMP	G3XAP6		6.05
129	Complement component C8 gamma chain	C8G	P07360		6.04	detected
130	Coagulation factor IX;Coagulation factor IXa light chain;Coagulation factor IXa heavy chain	F9	P00740	+	6.04	detected
131	Insulin-like growth factor-binding protein 6	IGFBP6	P24592		6.04
132	Ficolin-3	FCN3	O75636		6	detected
133	Protein Z-dependent protease inhibitor	SERPINA10	Q9UK55		5.99
134	Complement C1q subcomponent subunit B	C1QB	P02746	+	5.97
135	Complement C1q subcomponent subunit C	C1QC	P02747	+	5.96	detected
136	L-selectin	SELL	P14151		5.93
137	Secreted phosphoprotein 24	SPP2	Q13103		5.9
138	Extracellular matrix protein 1	ECM1	Q16610		5.89	detected
139	Actin, cytoplasmic 2;Actin, cytoplasmic 2, N-terminally processed	ACTG1	P63261		5.88
140	Actin, alpha skeletal muscle;Actin, alpha cardiac muscle 1	ACTA1;ACTC1;ACTB	P68133		5.88
141	Carboxypeptidase N catalytic chain	CPN1	P15169		5.86	detected
142	Carboxypeptidase B2	CPB2	Q96IY4		5.85
143	Attractin	ATRN	O75882		5.82	detected
144	Superoxide dismutase [Cu-Zn]	SOD1	P00441		5.78
145	Carbonic anhydrase 1	CA1	P00915		5.77
146	Retinoic acid receptor responder protein 2	RARRES2	Q99969		5.76
147	C4b-binding protein beta chain	C4BPB	P20851		5.72	detected
148	Hyaluronan-binding protein 2;Hyaluronan-binding protein 2 50 kDa heavy chain;Hyaluronan-binding protein 2 50 kDa heavy chain alternate form;Hyaluronan-binding protein 2 27 kDa light chain;Hyaluronan-binding protein 2 27 kDa light chain alternate form	HABP2	Q14520		5.71	detected
149	Selenoprotein P	SEPP1	P49908		5.71
150	Peroxiredoxin-2	PRDX2	P32119		5.71
151	Vitamin K-dependent protein C;Vitamin K-dependent protein C light chain;Vitamin K-dependent protein C heavy chain;Activation peptide	PROC	P04070	+	5.7	detected
152	Coagulation factor X;Factor X light chain;Factor X heavy chain;Activated factor Xa heavy chain	F10	P00742	+	5.7	detected
153	Biotinidase	BTD	P43251	+	5.69
154	Insulin-like growth factor-binding protein 7	IGFBP7	Q16270		5.68
155	Insulin-like growth factor-binding protein 2	IGFBP2	P18065		5.67
156	Phosphatidylinositol-glycan-specific phospholipase D	GPLD1	P80108		5.66	detected
157	Galectin-3-binding protein	LGALS3BP	Q08380		5.64	detected
158	Monocyte differentiation antigen CD14;Monocyte differentiation antigen CD14, urinary form;Monocyte differentiation antigen CD14, membrane-bound form	CD14	P08571		5.62	detected
159	Thrombospondin-1	THBS1	P07996		5.62	detected
160	Phosphatidylinositol 3,4,5-trisphosphate 5-phosphatase 1	INPP5D	Q92835		5.61
161	Filamin-A	FLNA	P21333		5.61
162	Collagen alpha-1(I) chain	COL1A1	P02452		5.59
163	Cathelicidin antimicrobial peptide;Antibacterial protein FALL-39;Antibacterial protein LL-37	CAMP	P49913		5.57
164	Di-N-acetylchitobiase	CTBS	Q01459		5.56
165	Tropomyosin beta chain	TPM2	P07951		5.53
166	Tropomyosin alpha-4 chain	TPM4	P67936		5.53
167	Tropomyosin alpha-3 chain	TPM3	P06753		5.53
168	Talin-1	TLN1	Q9Y490		5.53
169	Properdin	CFP	P27918		5.52	detected
170	Lipopolysaccharide-binding protein	LBP	P18428		5.51	detected
171	IgGFc-binding protein	FCGBP	Q9Y6R7		5.48		detected
172	Coagulation factor VII;Factor VII light chain;Factor VII heavy chain	F7	P08709		5.47
173	Transferrin receptor protein 1;Transferrin receptor protein 1, serum form	TFRC	P02786	+	5.46
174	Angiogenin	ANG	P03950		5.45
175	Fetuin-B	FETUB	Q9UGM5		5.43	detected
176	Protein S100-A8;Protein S100-A8, N-terminally processed	S100A8	P05109		5.43
177	Complement C1r subcomponent-like protein	C1RL	Q9NZP8		5.41
178	Proteoglycan 4;Proteoglycan 4 C-terminal part	PRG4	Q92954		5.41
179	EGF-containing fibulin-like extracellular matrix protein 1	EFEMP1	Q12805		5.41	detected
180	Hepatocyte growth factor-like protein;Hepatocyte growth factor-like protein alpha chain;Hepatocyte growth factor-like protein beta chain	MST1	P26927		5.4	detected
181	Gamma-glutamyl hydrolase	GGH	Q92820		5.4
182	Fructose-bisphosphate aldolase A	ALDOA	P04075	+	5.4
183	72 kDa type IV collagenase;PEX	MMP2	P08253		5.4
184	Fructose-bisphosphate aldolase C	ALDOC	P09972		5.4
185	Hepatocyte growth factor activator;Hepatocyte growth factor activator short chain;Hepatocyte growth factor activator long chain	HGFAC	Q04756		5.38	detected
186	Fructose-bisphosphate aldolase B	ALDOB	P05062	+	5.38
187	Beta-Ala-His dipeptidase	CNDP1	Q96KN2		5.36
188	Multimerin-2	MMRN2	E7EN39		5.36
189	Epididymal secretory protein E1	NPC2	P61916		5.36
190	Phosphatidylcholine-sterol acyltransferase	LCAT	P04180		5.34	detected
191	Catalase	CAT	P04040		5.34
192	Junction plakoglobin	JUP	P14923		5.32
193	Serine protease inhibitor Kazal-type 5;Hemofiltrate peptide HF6478;Hemofiltrate peptide HF7665	SPINK5	Q9NQ38		5.32
194	Histone H2A.Z;Histone H2A.V	H2AFZ;H2AFV	P0C0S5		5.3
195	Triosephosphate isomerase	TPI1	P60174		5.3
196	Platelet factor 4 variant;Platelet factor 4 variant(4-74);Platelet factor 4 variant(5-74);Platelet factor 4 variant(6-74);Platelet factor 4;Platelet factor 4, short form	PF4V1;PF4	P10720		5.28	detected
197	Phosphatidylethanolamine-binding protein 1;Hippocampal cholinergic neurostimulating peptide	PEBP1	P30086		5.28
198	Hornerin	HRNR	Q86YZ3		5.28	detected
199	Sex hormone-binding globulin	SHBG	P04278	+	5.26
200	14-3-3 protein zeta/delta	YWHAZ	P63104		5.26
201	Cathepsin D;Cathepsin D light chain;Cathepsin D heavy chain	CTSD	P07339		5.26
202	14-3-3 protein sigma	SFN	P31947		5.26
203	14-3-3 protein epsilon	YWHAE	P62258		5.26
204	14-3-3 protein gamma;14-3-3 protein gamma, N-terminally processed	YWHAG	P61981		5.26
205	14-3-3 protein theta	YWHAQ	P27348		5.26
206	14-3-3 protein beta/alpha;14-3-3 protein beta/alpha, N-terminally processed	YWHAB	P31946		5.26
207	14-3-3 protein eta	YWHAH	Q04917		5.26
208	Cholinesterase	BCHE	P06276	+	5.23
209	Mannan-binding lectin serine protease 1;Mannan-binding lectin serine protease 1 heavy chain;Mannan-binding lectin serine protease 1 light chain	MASP1	P48740		5.19
210	Sulfhydryl oxidase 1	QSOX1	O00391		5.18
211	Plastin-2	LCP1	P13796		5.18
212	Thymosin beta-10	TMSB10	P63313		5.18
213	Glucose-6-phosphate isomerase	GPI	P06744	+	5.18
214	Plastin-3	PLS3	P13797		5.18
215	Transforming growth factor-beta-induced protein ig-h3	TGFBI	Q15582		5.15
216	Peptidyl-prolyl cis-trans isomerase A;Peptidyl-prolyl cis-trans isomerase A, N-terminally processed;Peptidyl-prolyl cis-trans isomerase	PPIA	P62937		5.15
217	Cofilin-1	CFL1	P23528		5.15
218	Flavin reductase (NADPH)	BLVRB	P30043		5.15
219	Complement factor H-related protein 3	CFHR3	Q02985		5.15
220	Dermcidin;Survival-promoting peptide;DCD-1	DCD	P81605		5.11
221	Profilin-1	PFN1	P07737		5.11
222	Pro-cathepsin H;Cathepsin H mini chain;Cathepsin H;Cathepsin H heavy chain;Cathepsin H light chain	CTSH	P09668		5.11
223	Metalloproteinase inhibitor 1	TIMP1	P01033		5.1
224	Osteopontin	SPP1;opn	P10451		5.1
225	Cadherin-13	CDH13	P55290		5.08
226	Retinal dehydrogenase 1	ALDH1A1	P00352		5.08
227	Alpha-actinin-4	ACTN4	O43707		5.08
228	Basement membrane-specific heparan sulfate proteoglycan core protein;Endorepellin;LG3 peptide	HSPG2	P98160		5.08
229	Myoglobin	MB	P02144	+	5.08
230	Transgelin-2	TAGLN2	P37802		5.08
231	Extracellular superoxide dismutase [Cu-Zn]	SOD3	P08294		5.07
232	Endothelial protein C receptor	PROCR	Q9UNN8		5.05
233	Dopamine beta-hydroxylase;Soluble dopamine beta-hydroxylase	DBH	P09172		5.04
234	Procollagen C-endopeptidase enhancer 1	PCOLCE	Q15113		5.04
235	Heat shock cognate 71 kDa protein	HSPA8	P11142		5
236	78 kDa glucose-regulated protein	HSPA5	P11021		5
237	Heat shock 70 kDa protein 1A/1B	HSPA1A	P08107		5
238	Phosphoglycerate kinase 1;Phosphoglycerate kinase	PGK1	P00558		5
239	Collagen alpha-3(VI) chain	COL6A3	P12111		5
240	Calreticulin	CALR	P27797		5
241	Galectin-4	LGALS4	P56470		5		detected
242	Metalloproteinase inhibitor 2	TIMP2	P16035		4.97
243	Scavenger receptor cysteine-rich type 1 protein M130;Soluble CD163	CD163	Q86VB7		4.97
244	Cathepsin B;Cathepsin B light chain;Cathepsin B heavy chain	CTSB	P07858		4.97
245	Glyceraldehyde-3-phosphate dehydrogenase	GAPDH	P04406		4.96
246	Tubulin alpha-1B chain;Tubulin alpha-1C chain;Tubulin alpha-1A chain;Tubulin alpha-4A chain;Tubulin alpha-3C/D chain;Tubulin alpha-3E chain	TUBA1B;TUBA1C;TUBA1A;TUBA4A;TUBA3C;KLK9;TUBA3E	P68363		4.96
247	Golgi-associated plant pathogenesis-related protein 1	GLIPR2	Q9H4G4		4.96
248	Thrombospondin-4	THBS4	P35443		4.96
249	Apolipoprotein A-V	APOA5	Q6Q788		4.96
250	Transketolase	TKT	P29401		4.95
251	Vinculin	VCL	P18206		4.95
252	Selenium-binding protein 1	SELENBP1	Q13228		4.94
253	Heat shock protein HSP 90-beta	HSP90AB1	P08238		4.94
254	Heat shock protein HSP 90-alpha	HSP90AA1	P07900		4.94
255	Endoplasmin	HSP90B1	P14625		4.94
256	L-lactate dehydrogenase B chain;L-lactate dehydrogenase	LDHB	P07195	+	4.93
257	L-lactate dehydrogenase A chain	LDHA	P00338	+	4.93
258	Creatine kinase M-type;Creatine kinase M-type, N-terminally processed	CKM	P06732	+	4.93
259	Vasorin	VASN	Q6EMK4		4.92	detected
260	Chromogranin-A;Vasostatin-1;Vasostatin-2;EA-92;ES-43;Pancreastatin;SS-18;WA-8;WE-14;LF-19;AL-11;GV-19;GR-44;ER-37	CHGA	P10645		4.92
261	Mannose-binding protein C	MBL2	P11226		4.91	detected
262	Proprotein convertase subtilisin/kexin type 9	PCSK9	Q8NBP7		4.91
263	Galectin-1	LGALS1	P09382		4.91
264	Cystatin-B	CSTB	P04080		4.89
265	Histone H2B type 1-H;Histone H2B type 1-M;Histone H2B type 1-N;Histone H2B type 2-F;Histone H2B type 1-D;Histone H2B type 1-K;Histone H2B type 1-C/E/F/G/I;Histone H2B type F-S;Histone H2B;Histone H2B type 1-B;Histone H2B type 1-L;Histone H2B type 2-E;Histone H2B type 1-O;Histone H2B type 1-J;Histone H2B type 3-B;Histone H2B type 1-A	HIST1H2BH;HIST1H2BM;HIST1H2BN;HIST2H2BF;HIST1H2BD;HIST1H2BK;HIST1H2BC;H2BFS;HIST1H2BB;HIST1H2BL;HIST2H2BE;HIST1H2BO;HIST1H2BJ;HIST3H2BB;HIST1H2BA	Q93079		4.88
266	Alcohol dehydrogenase 1B;Alcohol dehydrogenase 1A;Alcohol dehydrogenase 1C	ADH1B;ADH1A;ADH1C	P00325		4.87
267	Cadherin-2	CDH2	P19022		4.86
268	Cadherin-5	CDH5	P33151		4.85
269	Tenascin-X	TNXB	P22105		4.85
270	Xaa-Pro dipeptidase	PEPD	P12955		4.85
271	P-selectin	SELP	P16109		4.82
272	Phospholipid transfer protein	PLTP	P55058		4.81
273	Creatine kinase B-type	CKB	P12277	+	4.81
274	Coagulation factor XI;Coagulation factor XIa heavy chain;Coagulation factor XIa light chain	F11	P03951		4.8	detected
275	Serum paraoxonase/lactonase 3	PON3	Q15166		4.8
276	Vascular cell adhesion protein 1	VCAM1	P19320		4.8
277	Membrane primary amine oxidase	AOC3	Q16853		4.8
278	Low affinity immunoglobulin gamma Fc region receptor III-A	FCGR3A	P08637		4.8
279	Low affinity immunoglobulin gamma Fc region receptor III-B	FCGR3B	O75015		4.8
280	Elongation factor 1-alpha 1;Putative elongation factor 1-alpha-like 3;Elongation factor 1-alpha 2	EEF1A1;EEF1A1P5;EEF1A2	P68104		4.79
281	Peroxiredoxin-1	PRDX1	Q06830		4.78
282	Myosin-9	MYH9	P35579		4.76
283	Noelin	OLFM1	Q99784		4.75
284	Pantetheinase	VNN1	O95497		4.75
285	Aspartate aminotransferase, cytoplasmic;Aspartate aminotransferase	GOT1	P17174	+	4.75
286	Fumarylacetoacetase	FAH	P16930		4.75
287	Glutamate dehydrogenase 1, mitochondrial	GLUD1	P00367		4.74
288	Alpha-enolase	ENO1	P06733		4.74
289	Prenylcysteine oxidase 1	PCYOX1	Q9UHG3		4.73
290	SPARC-like protein 1	SPARCL1	Q14515		4.72
291	Desmocollin-1	DSC1	Q08554		4.72
292	Lysozyme C	LYZ	P61626	+	4.71
293	Laminin subunit gamma-1	LAMC1	P11047		4.7
294	Phosphoglycerate mutase 1	PGAM1	P18669		4.68
295	Histidine triad nucleotide-binding protein 1	HINT1	P49773		4.68
296	Moesin	MSN	P26038		4.67
297	Receptor-type tyrosine-protein phosphatase mu	PTPRM	P28827		4.67
298	Fructose-1,6-bisphosphatase 1	FBP1	P09467		4.67
299	Ezrin	EZR	P15311		4.67
300	Liver carboxylesterase 1	CES1	P23141		4.66
301	High mobility group protein B1;Putative high mobility group protein B1-like 1	HMGB1;HMGB1P1	P09429		4.65		detected
302	Ribonuclease inhibitor	RNH1	P13489		4.63
303	Carbonic anhydrase 2	CA2	P00918		4.62
304	Nidogen-1	NID1	P14543		4.62
305	Tenascin	TNC	P24821		4.62
306	Fatty acid-binding protein, adipocyte;Myelin P2 protein	FABP4;PMP2	P15090		4.62
307	Nidogen-2	NID2	Q14112		4.62
308	Peptidase inhibitor 16	PI16	Q6UXB8		4.61
309	Fatty acid-binding protein, epidermal	FABP5	Q01469		4.6
310	Eukaryotic translation initiation factor 5A-1;Eukaryotic translation initiation factor 5A-2;Eukaryotic translation initiation factor 5A-1-like	EIF5A;EIF5A2;EIF5AL1	P63241		4.59
311	Malate dehydrogenase, cytoplasmic	MDH1	P40925		4.59
312	Ectonucleotide pyrophosphatase/phosphodiesterase family member 2	ENPP2	Q13822		4.59
313	Actin-related protein 3;Actin-related protein 3B	ACTR3;ACTR3B	P61158		4.58
314	Aminopeptidase N	ANPEP	P15144		4.56
315	CD166 antigen	ALCAM	Q13740		4.56
316	CD44 antigen	CD44	P16070		4.54
317	Collagen alpha-1(XVIII) chain;Endostatin	COL18A1	P39060		4.54
318	Receptor-type tyrosine-protein phosphatase F	PTPRF	P10586		4.54
319	Intelectin-1;Intelectin-2	ITLN1;ITLN2	Q8WWA0		4.54
320	Dystroglycan;Alpha-dystroglycan;Beta-dystroglycan	DAG1	Q14118		4.53
321	Neural cell adhesion molecule 1	NCAM1	P13591		4.52
322	Glutathione S-transferase omega-1	GSTO1	P78417		4.52
323	Prosaposin;Saposin-A;Saposin-B-Val;Saposin-B;Saposin-C;Saposin-D	PSAP	P07602		4.52
324	Fermitin family homolog 3	FERMT3	Q86UX7		4.51
325	Protein disulfide-isomerase A3;Protein disulfide-isomerase	PDIA3	P30101		4.51
326	Cell adhesion molecule 1	CADM1	Q9BY67		4.51
327	Elongation factor 2	EEF2	P13639		4.48
328	Histone H1.2;Histone H1.4;Histone H1.3	HIST1H1C;HIST1H1E;HIST1H1D	P16403		4.48
329	Ecto-ADP-ribosyltransferase 3	ART3	Q13508		4.48
330	Aminoacylase-1	ACY1	Q03154		4.48
331	Rab GDP dissociation inhibitor alpha	GDI1	P31150		4.46
332	Adipocyte plasma membrane-associated protein	APMAP	Q9HDC9		4.46	detected
333	6-phosphogluconate dehydrogenase, decarboxylating	PGD	P52209		4.46
334	Rab GDP dissociation inhibitor beta	GDI2	P50395		4.46
335	HLA class I histocompatibility antigen, A-68 alpha chain;HLA class I histocompatibility antigen, A-25 alpha chain;HLA class I histocompatibility antigen, A-66 alpha chain;HLA class I histocompatibility antigen, A-34 alpha chain;HLA class I histocompatibility antigen, A-26 alpha chain;HLA class I histocompatibility antigen, A-33 alpha chain	HLA-A	P01891		4.45
336	HLA class I histocompatibility antigen, B-73 alpha chain	HLA-B	Q31612		4.45
337	HLA class I histocompatibility antigen, Cw-15 alpha chain;HLA class I histocompatibility antigen, Cw-2 alpha chain;HLA class I histocompatibility antigen, Cw-3 alpha chain	HLA-C	Q07000		4.45
338	HLA class I histocompatibility antigen, Cw-6 alpha chain;HLA class I histocompatibility antigen, Cw-18 alpha chain;HLA class I histocompatibility antigen, Cw-1 alpha chain;HLA class I histocompatibility antigen, Cw-8 alpha chain;HLA class I histocompatibility antigen, Cw-5 alpha chain	HLA-C	B0UY12		4.45
339	Protein S100-A6	S100A6	P06703		4.45
340	HLA class I histocompatibility antigen, Cw-12 alpha chain;HLA class I histocompatibility antigen, Cw-14 alpha chain;HLA class I histocompatibility antigen, Cw-16 alpha chain;HLA class I histocompatibility antigen, Cw-4 alpha chain	HLA-C	P30508		4.45
341	HLA class I histocompatibility antigen, A-69 alpha chain;HLA class I histocompatibility antigen, A-2 alpha chain	HLA-A	P10316		4.45
342	Desmocollin-3	DSC3	Q14574		4.43
343	Cartilage acidic protein 1	CRTAC1	Q9NQ79		4.43
344	Ficolin-2	FCN2	Q15485		4.43
345	Tubulin beta chain;Tubulin beta-2B chain;Tubulin beta-2A chain;Tubulin beta-3 chain	TUBB;TUBB2B;TUBB2A;TUBB3	P07437		4.43
346	Adenylyl cyclase-associated protein 1;Adenylyl cyclase-associated protein	CAP1	Q01518		4.43
347	Cation-independent mannose-6-phosphate receptor	IGF2R	P11717		4.41
348	Collagen alpha-1(VI) chain	COL6A1	P12109		4.41
349	3-ketoacyl-CoA thiolase, mitochondrial	ACAA2	P42765		4.41
350	Polymeric immunoglobulin receptor;Secretory component	PIGR	P01833		4.4	detected
351	Cell surface glycoprotein MUC18	MCAM	P43121		4.4
352	Peroxiredoxin-6	PRDX6	P30041		4.4
353	Leukotriene A-4 hydrolase	LTA4H	P09960		4.4
354	Leukocyte immunoglobulin-like receptor subfamily A member 3	LILRA3	Q8N6C8		4.4
355	Poliovirus receptor	PVR	P15151		4.36
356	Protein disulfide-isomerase	P4HB	P07237		4.36
357	Protein DJ-1	PARK7	Q99497		4.36
358	Ribonuclease T2	RNASET2	O00584		4.36
359	Macrophage colony-stimulating factor 1 receptor	CSF1R	P07333		4.34
360	Non-histone chromosomal protein HMG-17;High mobility group nucleosome-binding domain-containing protein 3	HMGN2;HMGN3	P05204		4.34
361	Chloride intracellular channel protein 1	CLIC1	O00299		4.34
362	Prolactin-inducible protein	PIP	P12273		4.34
363	UTP--glucose-1-phosphate uridylyltransferase	UGP2	Q16851		4.32
364	Peptidyl-prolyl cis-trans isomerase B	PPIB	P23284		4.32
365	Calcium-regulated heat stable protein 1	CARHSP1	Q9Y2V2		4.32
366	Cytosolic non-specific dipeptidase	CNDP2	Q96KP4		4.30103		detected
367	Desmoplakin	DSP	P15924		4.3
368	Dermokine	DMKN	Q6E0U4		4.3
369	ADP-ribosyl cyclase/cyclic ADP-ribose hydrolase 2	BST1	Q10588		4.3
370	CD109 antigen	CD109	Q6YHK3		4.28
371	Platelet glycoprotein Ib alpha chain;Glycocalicin	GP1BA	P07359		4.26
372	Protein S100-A11;Protein S100-A11, N-terminally processed	S100A11	P31949		4.26
373	Nucleobindin-1	NUCB1	Q02818		4.26
374	Myotrophin	MTPN	P58546		4.26
375	Transitional endoplasmic reticulum ATPase	VCP	P55072		4.23
376	Bone morphogenetic protein 1	BMP1	P13497		4.23
377	40S ribosomal protein S28	RPS28	P62857		4.23
378	Proteasome subunit alpha type-6;Proteasome subunit alpha type	PSMA6	P60900		4.23
379	Periostin	POSTN	B1ALD9		4.2
380	Multiple inositol polyphosphate phosphatase 1	MINPP1	Q9UNW1		4.2
381	Mimecan	OGN	P20774		4.2
382	Cystatin-A;Cystatin-A, N-terminally processed	CSTA	P01040		4.2
383	Alanine aminotransferase 1	GPT	P24298	+	4.2
384	Limbic system-associated membrane protein	LSAMP	Q13449		4.2
385	Annexin A2;Annexin;Putative annexin A2-like protein	ANXA2;ANXA2P2	P07355		4.18
386	Malate dehydrogenase, mitochondrial;Malate dehydrogenase	MDH2	P40926		4.18
387	Glucosidase 2 subunit beta	PRKCSH	P14314		4.18
388	Voltage-dependent calcium channel subunit alpha-2/delta-1;Voltage-dependent calcium channel subunit alpha-2-1;Voltage-dependent calcium channel subunit delta-1	CACNA2D1	P54289		4.18
389	Transaldolase	TALDO1	P37837		4.18
390	Dickkopf-related protein 3	DKK3	Q9UBP4		4.18
391	Myosin light polypeptide 6	MYL6;PDE6H	P60660		4.15
392	Neural cell adhesion molecule L1-like protein;Processed neural cell adhesion molecule L1-like protein	CHL1	O00533		4.15
393	Contactin-1	CNTN1	Q12860		4.15
394	Desmoglein-1	DSG1	Q02413		4.15
395	Leukocyte elastase inhibitor	SERPINB1	P30740		4.15
396	Non-specific lipid-transfer protein	SCP2	P22307		4.15
397	4-hydroxyphenylpyruvate dioxygenase	HPD	P32754		4.11
398	Inhibin beta C chain	INHBC	P55103		4.11
399	Neuropilin-1	NRP1	O14786		4.11
400	S-formylglutathione hydrolase	ESD	P10768		4.11
401	4F2 cell-surface antigen heavy chain	SLC3A2	P08195		4.08
402	Angiopoietin-related protein 3	ANGPTL3	Q9Y5C1		4.08
403	Probable G-protein coupled receptor 116	GPR116	Q8IZF2		4.08
404	Ferritin light chain	FTL	P02792	+	4.08
405	PTB domain-containing engulfment adapter protein 1	GULP1	Q9UBP9		4.08
406	Alcohol dehydrogenase 4	ADH4	P08319		4.08
407	Cathepsin Z	CTSZ	Q9UBR2		4.08
408	Epidermal growth factor receptor	EGFR	P00533	+	4.06		detected
409	Carbamoyl-phosphate synthase [ammonia], mitochondrial	CPS1	P31327		4.04
410	Target of Nesh-SH3	ABI3BP	Q7Z7G0		4.04
411	Complement factor H-related protein 5	CFHR5	Q9BXR6		4.04	detected
412	Nucleoside diphosphate kinase B;Nucleoside diphosphate kinase;Putative nucleoside diphosphate kinase	NME2;NME1-NME2;NME1;NME2P1	P22392		4.04
413	Integrin beta-1	ITGB1	P05556		4.04
414	Proteasome subunit alpha type-4;Proteasome subunit alpha type;Proteasome subunit beta type	PSMA4	P25789		4.04
415	Aspartate aminotransferase, mitochondrial	GOT2	P00505		4.04
416	Vesicular integral-membrane protein VIP36	LMAN2	Q12907		4.04
417	Rho GDP-dissociation inhibitor 1	ARHGDIA	P52565		4.04
418	Proteasome subunit alpha type-3	PSMA3	P25788		4.04
419	Receptor-type tyrosine-protein phosphatase eta	PTPRJ	Q12913		4
420	Cadherin-1;E-Cad/CTF1;E-Cad/CTF2;E-Cad/CTF3	CDH1	P12830		4
421	Macrophage migration inhibitory factor	MIF	P14174		4
422	Caldesmon	CALD1	Q05682		4
423	Alpha-fetoprotein	AFP	P02771	+	4		detected
424	LIM and SH3 domain protein 1	LASP1	Q14847		3.99
425	Peroxiredoxin-5, mitochondrial	PRDX5	P30044		3.98
426	Proteasome subunit alpha type-7;Proteasome subunit alpha type-7-like	PSMA7;PSMA8	O14818		3.97
427	Filamin-B	FLNB	O75369		3.96
428	Purine nucleoside phosphorylase	PNP	P00491		3.96
429	Collagen alpha-1(XV) chain;Restin;Restin-2;Restin-3;Restin-4	COL15A1	P39059		3.94
430	Cathepsin L1;Cathepsin L1 heavy chain;Cathepsin L1 light chain	CTSL	P07711		3.94
431	Ubiquitin-like modifier-activating enzyme 1	UBA1	P22314		3.93
432	Mucin-1	MUC1	P15941	+	3.93		detected
433	Proteasome subunit alpha type-1;Proteasome subunit alpha type	PSMA1	P25786		3.92
434	Thioredoxin	TXN	P10599		3.92
435	40S ribosomal protein S12	RPS12	P25398		3.92
436	Calmodulin-like protein 5	CALML5	Q9NZT1		3.91
437	Mast/stem cell growth factor receptor Kit	KIT	P10721		3.91
438	Annexin;Annexin A5	ANXA5	D6RBL5		3.9
439	Small ubiquitin-related modifier 2;Small ubiquitin-related modifier 3;Small ubiquitin-related modifier 4	SUMO2;SUMO3;SUMO4	P61956		3.9
440	Calsyntenin-1;Soluble Alc-alpha;CTF1-alpha	CLSTN1	O94985		3.9
441	Cytochrome c	CYCS	P99999		3.9
442	Adenosine deaminase CECR1	CECR1	Q9NZK5		3.89
443	Proteasome subunit alpha type-5	PSMA5	P28066		3.89
444	Prelamin-A/C;Lamin-A/C	LMNA	P02545		3.88
445	Cysteine and glycine-rich protein 1	CSRP1	E9PS42		3.88
446	Plectin	PLEC	Q15149		3.88
447	Angiotensin-converting enzyme;Angiotensin-converting enzyme, soluble form	ACE	P12821	+	3.87
448	Lysosome-associated membrane glycoprotein 2	LAMP2	P13473		3.86
449	Brain acid soluble protein 1	BASP1	P80723		3.86
450	Prothymosin alpha;Prothymosin alpha, N-terminally processed;Thymosin alpha-1	PTMA	P06454		3.86
451	Multimerin-1;Platelet glycoprotein Ia*;155 kDa platelet multimerin	MMRN1	Q13201		3.86
452	Ankyrin repeat domain-containing protein 26	ANKRD26	Q9UPS8		3.86
453	Proteasome subunit beta type-2	PSMB2	P49721		3.86
454	Protein S100-P	S100P	P25815		3.86
455	Omega-amidase NIT2	NIT2	Q9NQR4		3.85
456	Superoxide dismutase [Mn], mitochondrial	SOD2	P04179		3.85
457	Endoglin	ENG	P17813		3.84
458	Glucose-6-phosphate 1-dehydrogenase	G6PD	P11413		3.84
459	N-acetylglucosamine-1-phosphotransferase subunit gamma	GNPTG	Q9UJJ9		3.83
460	Serpin A11	SERPINA11	Q86U17		3.83
461	Hypoxia up-regulated protein 1	HYOU1	Q9Y4L1		3.82
462	Protein HEG homolog 1	HEG1	Q9ULI3		3.82
463	Isocitrate dehydrogenase [NADP] cytoplasmic	IDH1	O75874		3.82
464	NADP-dependent malic enzyme	ME1	P48163		3.82
465	Phosphoserine aminotransferase	PSAT1	Q9Y617		3.81
466	10 kDa heat shock protein, mitochondrial	HSPE1	P61604		3.81
467	Oncoprotein-induced transcript 3 protein	OIT3	Q8WWZ8		3.81
468	Protein disulfide-isomerase A4	PDIA4	P13667		3.81
469	Neutral alpha-glucosidase AB	GANAB	Q14697		3.81
470	Receptor-type tyrosine-protein phosphatase S	PTPRS	Q13332		3.81
471	Lymphatic vessel endothelial hyaluronic acid receptor 1	LYVE1	Q9Y5Y7		3.79
472	ATP synthase subunit beta, mitochondrial;ATP synthase subunit beta	ATP5B	P06576		3.79
473	Annexin A1;Annexin	ANXA1	P04083		3.79
474	3-hydroxyacyl-CoA dehydrogenase type-2	HSD17B10	Q99714		3.79
475	Serpin B3	SERPINB3	P29508		3.79
476	Dipeptidyl peptidase 4;Dipeptidyl peptidase 4 membrane form;Dipeptidyl peptidase 4 soluble form	DPP4	P27487		3.78
477	Endoplasmic reticulum resident protein 29	ERP29	P30040		3.78
478	Tryptophan--tRNA ligase, cytoplasmic;T1-TrpRS;T2-TrpRS	WARS	P23381		3.78
479	Heterogeneous nuclear ribonucleoproteins C1/C2;Heterogeneous nuclear ribonucleoprotein C-like 1	HNRNPC;HNRNPCL1	P07910		3.77
480	Complement factor I;Complement factor I heavy chain;Complement factor I light chain	CFI	P05156		3.76	detected
481	Transcription factor BTF3	BTF3	P20290		3.76
482	UDP-GlcNAc:betaGal beta-1,3-N-acetylglucosaminyltransferase 2	B3GNT2	Q9NY97		3.76
483	Mannosyl-oligosaccharide 1,2-alpha-mannosidase IA	MAN1A1	P33908		3.75
484	40S ribosomal protein S23	RPS23	P62266		3.75
485	Macrophage mannose receptor 1	MRC1	P22897		3.75
486	Ribonuclease 4	RNASE4	P34096		3.74
487	Heat shock protein beta-1	HSPB1	P04792		3.72
488	40S ribosomal protein S19	RPS19	P39019		3.72
489	60 kDa heat shock protein, mitochondrial	HSPD1	P10809		3.71
490	Cathepsin S	CTSS	P25774		3.71
491	Endoplasmic reticulum aminopeptidase 1	ERAP1	Q9NZ08		3.71
492	40S ribosomal protein S25	RPS25	P62851		3.7
493	Proteasome subunit beta type-5	PSMB5	P28074		3.7
494	GDH/6PGL endoplasmic bifunctional protein;Glucose 1-dehydrogenase;6-phosphogluconolactonase	H6PD	O95479		3.69
495	Receptor-type tyrosine-protein phosphatase gamma	PTPRG	P23470		3.69
496	116 kDa U5 small nuclear ribonucleoprotein component	EFTUD2	Q15029		3.69
497	Fumarate hydratase, mitochondrial	FH	P07954		3.69
498	40S ribosomal protein S14	RPS14	P62263		3.68
499	Fatty acid synthase;[Acyl-carrier-protein] S-acetyltransferase;[Acyl-carrier-protein] S-malonyltransferase;3-oxoacyl-[acyl-carrier-protein] synthase;3-oxoacyl-[acyl-carrier-protein] reductase;3-hydroxyacyl-[acyl-carrier-protein] dehydratase;Enoyl-[acyl-carrier-protein] reductase;Oleoyl-[acyl-carrier-protein] hydrolase	FASN	P49327		3.68
500	Guanine deaminase	GDA	Q9Y2T3		3.68
501	Proteasome subunit beta type-7	PSMB7	Q99436		3.68
502	Interleukin-1 receptor accessory protein	IL1RAP	Q9NPH3		3.67
503	Collectin-10	COLEC10	Q9Y6Z7		3.67
504	Glycogen phosphorylase, liver form;Phosphorylase;Glycogen phosphorylase, brain form;Glycogen phosphorylase, muscle form	PYGL;PYGB;PYGM	P06737		3.67	detected
505	F-actin-capping protein subunit alpha-1	CAPZA1	P52907		3.66
506	GTP-binding nuclear protein Ran	RAN	P62826		3.66
507	Filaggrin-2	FLG2	Q5D862		3.66	detected
508	Endothelial cell-selective adhesion molecule	ESAM	Q96AP7		3.66
509	T-complex protein 1 subunit gamma	CCT3	P49368		3.65
510	Suprabasin	SBSN	E9PBV3		3.65
511	Cadherin-related family member 5	CDHR5	Q9HBB8		3.64
512	Enoyl-CoA delta isomerase 1, mitochondrial	ECI1;DCI	P42126		3.64
513	Nucleosome assembly protein 1-like 1	NAP1L1	P55209		3.63
514	Neogenin	NEO1	Q92859		3.62
515	Hepatoma-derived growth factor	HDGF	P51858		3.62
516	Heterogeneous nuclear ribonucleoproteins A2/B1	HNRNPA2B1	P22626		3.61
517	Titin	TTN	Q8WZ42		3.61
518	Vascular endothelial growth factor receptor 3	FLT4	P35916		3.61
519	Neuronal growth regulator 1	NEGR1	Q7Z3B1		3.6
520	Eukaryotic initiation factor 4A-I	EIF4A1	P60842		3.6
521	Protein disulfide-isomerase A6	PDIA6	Q15084		3.6
522	60S ribosomal protein L5	RPL5	P46777		3.6
523	Nucleophosmin	NPM1	P06748		3.59
524	Alpha-mannosidase 2	MAN2A1	Q16706		3.59
525	Dihydrolipoyl dehydrogenase, mitochondrial	DLD	P09622		3.59
526	Protein-L-isoaspartate(D-aspartate) O-methyltransferase;Protein-L-isoaspartate O-methyltransferase	PCMT1	P22061		3.59
527	Tissue alpha-L-fucosidase	FUCA1	P04066		3.59
528	Ubiquitin-conjugating enzyme E2 N;Putative ubiquitin-conjugating enzyme E2 N-like	UBE2N;UBE2NL	P61088		3.57
529	Follistatin-related protein 1	FSTL1	Q12841		3.56
530	Intercellular adhesion molecule 3	ICAM3	P32942		3.56
531	Proteasome subunit beta type-6	PSMB6	P28072		3.54
532	Glutathione reductase, mitochondrial	GSR	P00390		3.54
533	Poly(rC)-binding protein 1	PCBP1	Q15365		3.54
534	Voltage-dependent anion-selective channel protein 1	VDAC1	P21796		3.54
535	Heterogeneous nuclear ribonucleoprotein U	HNRNPU	Q00839		3.54
536	Poly(rC)-binding protein 2;Poly(rC)-binding protein 3	PCBP2;PCBP3	Q15366		3.54
537	60S ribosomal protein L7a	RPL7A	P62424		3.54
538	60S ribosomal protein L11	RPL11	P62913		3.53
539	40S ribosomal protein S2	RPS2	P15880		3.53
540	Microtubule-associated protein RP/EB family member 1	MAPRE1	Q15691		3.52
541	N-acetyllactosaminide beta-1,3-N-acetylglucosaminyltransferase	B3GNT1	O43505		3.52
542	BPI fold-containing family B member 1	BPIFB1	Q8TDL5		3.52
543	Bleomycin hydrolase	BLMH	Q13867		3.52
544	Putative sodium-coupled neutral amino acid transporter 10	SLC38A10	Q9HBR0		3.52
545	Protein S100-A4	S100A4	P26447		3.51
546	Trifunctional purine biosynthetic protein adenosine-3;Phosphoribosylamine--glycine ligase;Phosphoribosylformylglycinamidine cyclo-ligase;Phosphoribosylglycinamide formyltransferase	GART	P22102		3.49
547	Ribosyldihydronicotinamide dehydrogenase [quinone]	NQO2	P16083		3.49
548	40S ribosomal protein S20	RPS20	P60866		3.46
549	Nascent polypeptide-associated complex subunit alpha, muscle-specific form;Nascent polypeptide-associated complex subunit alpha	NACA	E9PAV3		3.46
550	Growth factor receptor-bound protein 2	GRB2	P62993		3.46
551	Epiplakin	EPPK1	P58107		3.45
552	Succinyl-CoA ligase [ADP/GDP-forming] subunit alpha, mitochondrial	SUCLG1	P53597		3.45
553	Proliferation-associated protein 2G4	PA2G4	Q9UQ80		3.45
554	EGF, latrophilin and seven transmembrane domain-containing protein 1	ELTD1	Q9HBW9		3.45
555	Desmoglein-2	DSG2	Q14126		3.43
556	Desmocollin-2	DSC2	Q02487		3.43
557	Hypoxanthine-guanine phosphoribosyltransferase	HPRT1	P00492		3.41
558	Heterogeneous nuclear ribonucleoprotein A1;Heterogeneous nuclear ribonucleoprotein A1, N-terminally processed;Heterogeneous nuclear ribonucleoprotein A1-like 2	HNRNPA1;HNRNPA1L2	P09651		3.41
559	Laminin subunit beta-1	LAMB1	P07942		3.41
560	40S ribosomal protein SA	RPSA;RPSAP58	P08865		3.41
561	Translationally-controlled tumor protein;TPT1-like protein	TPT1	P13693		3.41
562	Pyruvate kinase PKM;Pyruvate kinase	PKM;PKM2	P14618		3.4
563	ATP synthase subunit alpha, mitochondrial	ATP5A1	P25705		3.4
564	Pyruvate kinase PKM;Pyruvate kinase	PKM	P14618		3.4
565	Stress-70 protein, mitochondrial	HSPA9	P38646		3.4
566	Guanine nucleotide-binding protein G(I)/G(S)/G(T) subunit beta-1;Guanine nucleotide-binding protein G(I)/G(S)/G(T) subunit beta-2;Guanine nucleotide-binding protein subunit beta-4	GNB1;GNB2;GNB4	P62873		3.4
567	Laminin subunit beta-2	LAMB2	P55268		3.4
568	Osteoclast-associated immunoglobulin-like receptor	OSCAR	Q8IYS5		3.4
569	Carcinoembryonic antigen-related cell adhesion molecule 5	CEA	P06731	+	3.39794		detected
570	Protein-glutamine gamma-glutamyltransferase E;Protein-glutamine gamma-glutamyltransferase E 50 kDa catalytic chain;Protein-glutamine gamma-glutamyltransferase E 27 kDa non-catalytic chain	TGM3	Q08188		3.38
571	Fibrinogen-like protein 1	FGL1	Q08830		3.36
572	Nuclease-sensitive element-binding protein 1	YBX1	P67809		3.36
573	Plasminogen activator inhibitor 1 RNA-binding protein	SERBP1	Q8NC51		3.36
574	ICOS ligand	ICOSLG	O75144		3.34
575	Aldehyde dehydrogenase, mitochondrial	ALDH2	P05091		3.32
576	Glutamyl aminopeptidase	ENPEP	Q07075		3.32
577	Argininosuccinate synthase	ASS1	P00966		3.3
578	Fibroblast growth factor receptor 1	FGFR1	P11362		3.3
579	Complement receptor type 2	CR2	P20023		3.3
580	Myosin regulatory light polypeptide 9;Myosin regulatory light chain 12B;Myosin regulatory light chain 12A	MYL9;MYL12B;MYL12A	P24844		3.3
581	Seprase	FAP	Q12884		3.3
582	Oncostatin-M-specific receptor subunit beta	OSMR	Q99650		3.29
583	Caspase-14;Caspase-14 subunit p19;Caspase-14 subunit p10	CASP14	P31944		3.28
584	60S ribosomal protein L12	RPL12	P30050		3.28
585	Farnesyl pyrophosphate synthase	FDPS	P14324		3.28
586	Polyadenylate-binding protein 1;Polyadenylate-binding protein 3;Polyadenylate-binding protein 5;Polyadenylate-binding protein 1-like	PABPC1;PABPC3;PABPC5;PABPC1L	P11940		3.28
587	Stress-induced-phosphoprotein 1	STIP1	P31948		3.26
588	Lamina-associated polypeptide 2, isoforms beta/gamma;Thymopoietin;Thymopentin;Lamina-associated polypeptide 2, isoform alpha;Thymopoietin;Thymopentin	TMPO	P42167		3.26
589	Fascin	FSCN1	Q16658		3.26
590	40S ribosomal protein S10;Putative 40S ribosomal protein S10-like	RPS10;RPS10P5	P46783		3.23
591	T-complex protein 1 subunit eta	CCT7	Q99832		3.23
592	40S ribosomal protein S18	RPS18	P62269		3.23
593	ATP synthase subunit O, mitochondrial	ATP5O	P48047		3.23
594	Dimethylglycine dehydrogenase, mitochondrial	DMGDH	Q9UI17		3.2
595	Plexin domain-containing protein 2	PLXDC2	Q6UX71		3.2
596	Lysosome-associated membrane glycoprotein 1	LAMP1	P11279		3.2
597	UDP-glucose:glycoprotein glucosyltransferase 1	UGGT1	Q9NYU2		3.2
598	Destrin	DSTN	P60981		3.18
599	Beta-hexosaminidase subunit beta;Beta-hexosaminidase subunit beta chain B;Beta-hexosaminidase subunit beta chain A	HEXB	P07686		3.18
600	Heterogeneous nuclear ribonucleoprotein K	HNRNPK	P61978		3.15
601	Apolipoprotein(a)	LPA	P08519	+	3.15	detected
602	Uromodulin;Uromodulin, secreted form	UMOD	P07911		3.15
603	Nucleoside diphosphate kinase 3	NME3	Q13232		3.15
604	Alpha-N-acetylglucosaminidase;Alpha-N-acetylglucosaminidase 82 kDa form;Alpha-N-acetylglucosaminidase 77 kDa form	NAGLU	P54802		3.15
605	Apoptosis-inducing factor 1, mitochondrial	AIFM1	O95831		3.15
606	Plasma alpha-L-fucosidase	FUCA2	Q9BTY2		3.11
607	Interleukin-6 receptor subunit beta	IL6ST	P40189		3.11
608	Perilipin-3	PLIN3	O60664		3.11
609	A disintegrin and metalloproteinase with thrombospondin motifs 13	ADAMTS13	Q76LX8		3.08
610	Phosphoenolpyruvate carboxykinase [GTP], mitochondrial;Phosphoenolpyruvate carboxykinase, cytosolic [GTP]	PCK2;PCK1	Q16822		3.08
611	T-complex protein 1 subunit delta	CCT4	P50991		3.08
612	Thimet oligopeptidase	THOP1	P52888		3.08
613	Lamin-B1	LMNB1	P20700		3.08
614	Threonine--tRNA ligase, cytoplasmic;Probable threonine--tRNA ligase 2, cytoplasmic	TARS;TARSL2	P26639		3.04
615	ATP-citrate synthase	ACLY	P53396		3.04
616	Endoplasmic reticulum aminopeptidase 2	ERAP2	Q6P179		2.99
617	Coagulation factor VIII;Factor VIIIa heavy chain, 200 kDa isoform;Factor VIIIa heavy chain, 92 kDa isoform;Factor VIII B chain;Factor VIIIa light chain	F8	P00451		2.92
618	Filaggrin	FLG	P20930		2.91
619	Neuroblast differentiation-associated protein AHNAK	AHNAK	Q09666		2.9
620	Cysteine-rich secretory protein 3	CRISP3	P54108		0.8
621	Interleukin-6	IL6	P05231	+	0.69897
622	Multiple epidermal growth factor-like domains protein 8	MEGF8	Q7Z7M0		0.63
*protein concentration in plasma was reported in Cell systems, 2016, 2, 185-195

## Sheet: Quantification
No.	Accession	Gene names	Protein names	Status	Patient 1_PSMs	Patient 2_PSMs	Patient 3_PSMs	Patient 4_PSMs	Patient 5_PSMs
1	P02768	ALB GIG20 GIG42 PRO0903 PRO1708 PRO2044 PRO2619 PRO2675 UNQ696/PRO1341	Serum albumin	reviewed	1180	1362	1126	1212	1234
2	A0A0C4DGB6	ALB	Serum albumin	unreviewed	1091	1275	1093	1164	1155
3	P01024	C3 CPAMD1	Complement C3 (C3 and PZP-like alpha-2-macroglobulin domain-containing protein 1) [Cleaved into: Complement C3 beta chain; C3-beta-c (C3bc); Complement C3 alpha chain; C3a anaphylatoxin; Acylation stimulating protein (ASP) (C3adesArg); Complement C3b alpha' chain; Complement C3c alpha' chain fragment 1; Complement C3dg fragment; Complement C3g fragment; Complement C3d fragment; Complement C3f fra…	reviewed	264	224	238	272	238
4	P02671	FGA	Fibrinogen alpha chain [Cleaved into: Fibrinopeptide A; Fibrinogen alpha chain]	reviewed	236	159	178	239	232
5	P04114	APOB	Apolipoprotein B-100 (Apo B-100) [Cleaved into: Apolipoprotein B-48 (Apo B-48)]	reviewed	201	230	89	186	225
6	P02787	TF PRO1400	Serotransferrin (Transferrin) (Beta-1 metal-binding globulin) (Siderophilin)	reviewed	320	322	308	329	239
7	P02675	FGB	Fibrinogen beta chain [Cleaved into: Fibrinopeptide B; Fibrinogen beta chain]	reviewed	123	81	92	107	109
8	P0C0L4	C4A CO4 CPAMD2	Complement C4-A (Acidic complement C4) (C3 and PZP-like alpha-2-macroglobulin domain-containing protein 2) [Cleaved into: Complement C4 beta chain; Complement C4-A alpha chain; C4a anaphylatoxin; C4b-A; C4d-A; Complement C4 gamma chain]	reviewed	190	120	109	0	132
9	P0C0L5	C4B CO4 CPAMD3; C4B_2	Complement C4-B (Basic complement C4) (C3 and PZP-like alpha-2-macroglobulin domain-containing protein 3) [Cleaved into: Complement C4 beta chain; Complement C4-B alpha chain; C4a anaphylatoxin; C4b-B; C4d-B; Complement C4 gamma chain]	reviewed	188	122	110	147	136
10	P00738	HP	Haptoglobin (Zonulin) [Cleaved into: Haptoglobin alpha chain; Haptoglobin beta chain]	reviewed	238	120	110	145	185
11	P01023	A2M CPAMD5 FWP007	Alpha-2-macroglobulin (Alpha-2-M) (C3 and PZP-like alpha-2-macroglobulin domain-containing protein 5)	reviewed	200	125	126	138	125
12	P01876	IGHA1	Immunoglobulin heavy constant alpha 1 (Ig alpha-1 chain C region) (Ig alpha-1 chain C region BUR) (Ig alpha-1 chain C region TRO)	reviewed	63	55	62	112	69
13	P02647	APOA1	Apolipoprotein A-I (Apo-AI) (ApoA-I) (Apolipoprotein A1) [Cleaved into: Proapolipoprotein A-I (ProapoA-I); Truncated apolipoprotein A-I (Apolipoprotein A-I(1-242))]	reviewed	135	145	139	163	110
14	C9JEU5	FGG	Fibrinogen gamma chain	unreviewed	79	40	53	69	65
15	P08603	CFH HF HF1 HF2	Complement factor H (H factor 1)	reviewed	95	95	64	71	66
16	P00747	PLG	Plasminogen (EC 3.4.21.7) [Cleaved into: Plasmin heavy chain A; Activation peptide; Angiostatin; Plasmin heavy chain A, short form; Plasmin light chain B]	reviewed	93	65	73	103	72
17	P00450	CP	Ceruloplasmin (EC 1.16.3.1) (Ferroxidase)	reviewed	73	0	0	65	62
18	P02774	GC	Vitamin D-binding protein (DBP) (VDB) (Gc protein-derived macrophage activating factor) (Gc-MAF) (GcMAF) (Gc-globulin) (Group-specific component) (Gc) (Vitamin D-binding protein-macrophage activating factor) (DBP-maf)	reviewed	0	71	0	90	69
19	B4E1Z4		cDNA FLJ55673, highly similar to Complement factor B (EC 3.4.21.47)	unreviewed	126	82	61	85	111
20	P00734	F2	Prothrombin (EC 3.4.21.5) (Coagulation factor II) [Cleaved into: Activation peptide fragment 1; Activation peptide fragment 2; Thrombin light chain; Thrombin heavy chain]	reviewed	42	41	37	54	32
21	A0A0G2JMB2	IGHA2	Immunoglobulin heavy constant alpha 2 (Fragment)	unreviewed	43	34	47	59	52
22	P01860	IGHG3	Immunoglobulin heavy constant gamma 3 (HDC) (Heavy chain disease protein) (Ig gamma-3 chain C region)	reviewed	41	35	44	45	58
23	A0A024R6I7	SERPINA1 hCG_2029168	Alpha-1-antitrypsin (Serpin peptidase inhibitor, clade A (Alpha-1 antiproteinase, antitrypsin), member 1, isoform CRA_a)	unreviewed	94	77	66	94	80
24	P00739	HPR	Haptoglobin-related protein	reviewed	75	48	40	53	67
25	P01857	IGHG1	Immunoglobulin heavy constant gamma 1 (Ig gamma-1 chain C region) (Ig gamma-1 chain C region EU) (Ig gamma-1 chain C region KOL) (Ig gamma-1 chain C region NIE)	reviewed	24	35	35	46	50
26	P01859	IGHG2	Immunoglobulin heavy constant gamma 2 (Ig gamma-2 chain C region) (Ig gamma-2 chain C region DOT) (Ig gamma-2 chain C region TIL) (Ig gamma-2 chain C region ZIE)	reviewed	25	32	25	33	55
27	P01861	IGHG4	Immunoglobulin heavy constant gamma 4 (Ig gamma-4 chain C region)	reviewed	18	30	25	34	40
28	P01042	KNG1 BDK KNG	Kininogen-1 (Alpha-2-thiol proteinase inhibitor) (Fitzgerald factor) (High molecular weight kininogen) (HMWK) (Williams-Fitzgerald-Flaujeac factor) [Cleaved into: Kininogen-1 heavy chain; T-kinin (Ile-Ser-Bradykinin); Bradykinin (Kallidin I); Lysyl-bradykinin (Kallidin II); Kininogen-1 light chain; Low molecular weight growth-promoting factor]	reviewed	56	52	46	53	52
29	C9JPQ9	FGG	Fibrinogen gamma chain (Fragment)	unreviewed	0	14	0	25	23
30	P0DOY3	IGLC3	Immunoglobulin lambda constant 3 (Ig lambda chain C region DOT) (Ig lambda chain C region NEWM) (Ig lambda-3 chain C regions)	reviewed	25	19	27	58	32
31	P04003	C4BPA C4BP	C4b-binding protein alpha chain (C4bp) (Proline-rich protein) (PRP)	reviewed	59	23	28	49	37
32	P04217	A1BG	Alpha-1B-glycoprotein (Alpha-1-B glycoprotein)	reviewed	31	27	17	26	28
33	P06727	APOA4	Apolipoprotein A-IV (Apo-AIV) (ApoA-IV) (Apolipoprotein A4)	reviewed	12	58	73	74	31
34	P01834	IGKC	Immunoglobulin kappa constant (Ig kappa chain C region) (Ig kappa chain C region AG) (Ig kappa chain C region CUM) (Ig kappa chain C region EU) (Ig kappa chain C region OU) (Ig kappa chain C region ROY) (Ig kappa chain C region TI)	reviewed	15	5	16	16	7
35	P01877	IGHA2	Immunoglobulin heavy constant alpha 2 (Ig alpha-2 chain C region) (Ig alpha-2 chain C region BUT) (Ig alpha-2 chain C region LAN)	reviewed	0	0	0	0	0
36	P01008	SERPINC1 AT3 PRO0309	Antithrombin-III (ATIII) (Serpin C1)	reviewed	36	36	26	35	22
37	P02649	APOE	Apolipoprotein E (Apo-E)	reviewed	32	42	24	43	49
38	P10909	CLU APOJ CLI KUB1 AAG4	Clusterin (Aging-associated gene 4 protein) (Apolipoprotein J) (Apo-J) (Complement cytolysis inhibitor) (CLI) (Complement-associated protein SP-40,40) (Ku70-binding protein 1) (NA1/NA2) (Testosterone-repressed prostate message 2) (TRPM-2) [Cleaved into: Clusterin beta chain (ApoJalpha) (Complement cytolysis inhibitor a chain); Clusterin alpha chain (ApoJbeta) (Complement cytolysis inhibitor b cha…	reviewed	33	40	32	47	33
39	P02765	AHSG FETUA PRO2743	Alpha-2-HS-glycoprotein (Alpha-2-Z-globulin) (Ba-alpha-2-glycoprotein) (Fetuin-A) [Cleaved into: Alpha-2-HS-glycoprotein chain A; Alpha-2-HS-glycoprotein chain B]	reviewed	24	36	22	29	18
40	P02790	HPX	Hemopexin (Beta-1B-glycoprotein)	reviewed	64	41	49	46	43
41	Q14624	ITIH4 IHRP ITIHL1 PK120 PRO1851	Inter-alpha-trypsin inhibitor heavy chain H4 (ITI heavy chain H4) (ITI-HC4) (Inter-alpha-inhibitor heavy chain 4) (Inter-alpha-trypsin inhibitor family heavy chain-related protein) (IHRP) (Plasma kallikrein sensitive glycoprotein 120) (Gp120) (PK-120) [Cleaved into: 70 kDa inter-alpha-trypsin inhibitor heavy chain H4; 35 kDa inter-alpha-trypsin inhibitor heavy chain H4]	reviewed	40	22	35	46	36
42	B9A064	IGLL5	Immunoglobulin lambda-like polypeptide 5 (G lambda-1) (Germline immunoglobulin lambda 1)	reviewed	0	19	0	37	30
43	P02751	FN1 FN	Fibronectin (FN) (Cold-insoluble globulin) (CIG) [Cleaved into: Anastellin; Ugl-Y1; Ugl-Y2; Ugl-Y3]	reviewed	0	0	1	3	0
44	P06396	GSN	Gelsolin (AGEL) (Actin-depolymerizing factor) (ADF) (Brevin)	reviewed	21	27	27	30	16
45	P19827	ITIH1 IGHEP1	Inter-alpha-trypsin inhibitor heavy chain H1 (ITI heavy chain H1) (ITI-HC1) (Inter-alpha-inhibitor heavy chain 1) (Inter-alpha-trypsin inhibitor complex component III) (Serum-derived hyaluronan-associated protein) (SHAP)	reviewed	26	39	28	36	32
46	H7C0L5	ITIH4	Inter-alpha-trypsin inhibitor heavy chain H4 (Fragment)	unreviewed	42	23	29	40	33
47	P04004	VTN	Vitronectin (VN) (S-protein) (Serum-spreading factor) (V75) [Cleaved into: Vitronectin V65 subunit; Vitronectin V10 subunit; Somatomedin-B]	reviewed	29	30	22	24	22
48	O43866	CD5L API6 UNQ203/PRO229	CD5 antigen-like (Apoptosis inhibitor expressed by macrophages) (hAIM) (CT-2) (IgM-associated peptide) (SP-alpha)	reviewed	15	31	15	15	23
49	P01011	SERPINA3 AACT GIG24 GIG25	Alpha-1-antichymotrypsin (ACT) (Cell growth-inhibiting gene 24/25 protein) (Serpin A3) [Cleaved into: Alpha-1-antichymotrypsin His-Pro-less]	reviewed	35	13	9	17	31
50	Q5T985	ITIH2	Inter-alpha-trypsin inhibitor heavy chain H2	unreviewed	38	40	34	34	35
51	P02749	APOH B2G1	Beta-2-glycoprotein 1 (APC inhibitor) (Activated protein C-binding protein) (Anticardiolipin cofactor) (Apolipoprotein H) (Apo-H) (Beta-2-glycoprotein I) (B2GPI) (Beta(2)GPI)	reviewed	18	18	11	17	10
52	P13671	C6	Complement component C6	reviewed	29	20	12	24	16
53	P02748	C9	Complement component C9 [Cleaved into: Complement component C9a; Complement component C9b]	reviewed	31	27	17	27	29
54	P43652	AFM ALB2 ALBA	Afamin (Alpha-albumin) (Alpha-Alb)	reviewed	16	10	11	22	13
55	P02760	AMBP HCP ITIL	Protein AMBP [Cleaved into: Alpha-1-microglobulin (Protein HC) (Alpha-1 microglycoprotein) (Complex-forming glycoprotein heterogeneous in charge); Inter-alpha-trypsin inhibitor light chain (ITI-LC) (Bikunin) (EDC1) (HI-30) (Uronic-acid-rich protein); Trypstatin]	reviewed	19	17	12	17	17
56	A6XGL3	PRSS1	Protease serine 1 (Trypsin-1)	unreviewed	34	24	25	27	31
57	P05090	APOD	Apolipoprotein D (Apo-D) (ApoD)	reviewed	13	15	17	13	14
58	P03952	KLKB1 KLK3	Plasma kallikrein (EC 3.4.21.34) (Fletcher factor) (Kininogenin) (Plasma prekallikrein) (PKK) [Cleaved into: Plasma kallikrein heavy chain; Plasma kallikrein light chain]	reviewed	13	18	6	0	0
59	P04196	HRG	Histidine-rich glycoprotein (Histidine-proline-rich glycoprotein) (HPRG)	reviewed	12	18	19	12	9
60	P07358	C8B	Complement component C8 beta chain (Complement component 8 subunit beta)	reviewed	0	0	14	0	0
61	P07225	PROS1 PROS	Vitamin K-dependent protein S	reviewed	16	9	9	17	10
62	A0M8Q6	IGLC7	Immunoglobulin lambda constant 7 (Ig lambda-7 chain C region)	reviewed	0	0	0	0	0
63	P02652	APOA2	Apolipoprotein A-II (Apo-AII) (ApoA-II) (Apolipoprotein A2) [Cleaved into: Proapolipoprotein A-II (ProapoA-II); Truncated apolipoprotein A-II (Apolipoprotein A-II(1-76))]	reviewed	0	0	0	0	0
64	D6RD17	JCHAIN	Immunoglobulin J chain (Fragment)	unreviewed	5	0	6	10	14
65	P01031	C5 CPAMD4	Complement C5 (C3 and PZP-like alpha-2-macroglobulin domain-containing protein 4) [Cleaved into: Complement C5 beta chain; Complement C5 alpha chain; C5a anaphylatoxin; Complement C5 alpha' chain]	reviewed	24	19	15	31	20
66	P07357	C8A	Complement component C8 alpha chain (Complement component 8 subunit alpha)	reviewed	21	17	12	17	17
67	P05155	SERPING1 C1IN C1NH	Plasma protease C1 inhibitor (C1 Inh) (C1Inh) (C1 esterase inhibitor) (C1-inhibiting factor) (Serpin G1)	reviewed	29	13	17	22	25
68	Q96PD5	PGLYRP2 PGLYRPL PGRPL UNQ3103/PRO10102	N-acetylmuramoyl-L-alanine amidase (EC 3.5.1.28) (Peptidoglycan recognition protein 2) (Peptidoglycan recognition protein long) (PGRP-L)	reviewed	7	8	4	8	3
69	A0A096LPE2	SAA2-SAA4	SAA2-SAA4 readthrough	unreviewed	34	0	0	17	38
70	A0A087WW43	ITIH3	Inter-alpha-trypsin inhibitor heavy chain H3	unreviewed	19	8	3	10	17
71	P68871	HBB	Hemoglobin subunit beta (Beta-globin) (Hemoglobin beta chain) [Cleaved into: LVV-hemorphin-7; Spinorphin]	reviewed	10	15	13	14	11
72	Q03591	CFHR1 CFHL CFHL1 CFHL1P CFHR1P FHR1 HFL1 HFL2	Complement factor H-related protein 1 (FHR-1) (H factor-like protein 1) (H-factor-like 1) (H36)	reviewed	9	0	0	0	7
73	F8WCZ6	C1S	Complement C1s subcomponent	unreviewed	12	8	8	8	12
74	P02656	APOC3	Apolipoprotein C-III (Apo-CIII) (ApoC-III) (Apolipoprotein C3)	reviewed	3	5	3	11	4
75	P00736	C1R	Complement C1r subcomponent (EC 3.4.21.41) (Complement component 1 subcomponent r) [Cleaved into: Complement C1r subcomponent heavy chain; Complement C1r subcomponent light chain]	reviewed	12	9	9	13	10
76	G3XAM2	CFI hCG_21044	Complement factor I (Complement factor I, isoform CRA_b)	unreviewed	0	9	8	11	14
77	P10643	C7	Complement component C7	reviewed	25	10	16	23	16
78	P36955	SERPINF1 PEDF PIG35	Pigment epithelium-derived factor (PEDF) (Cell proliferation-inducing gene 35 protein) (EPC-1) (Serpin F1)	reviewed	7	15	10	12	8
79	P05546	SERPIND1 HCF2	Heparin cofactor 2 (Heparin cofactor II) (HC-II) (Protease inhibitor leuserpin-2) (HLS2) (Serpin D1)	reviewed	13	7	3	11	7
80	A0A087WWY0	LPA	Apolipoprotein(a)	unreviewed	4	0	4	0	0
81	O14791	APOL1 APOL	Apolipoprotein L1 (Apolipoprotein L) (Apo-L) (ApoL) (Apolipoprotein L-I) (ApoL-I)	reviewed	10	4	6	8	3
82	P02750	LRG1 LRG	Leucine-rich alpha-2-glycoprotein (LRG)	reviewed	9	3	3	3	8
83	P08697	SERPINF2 AAP PLI	Alpha-2-antiplasmin (Alpha-2-AP) (Alpha-2-plasmin inhibitor) (Alpha-2-PI) (Serpin F2)	reviewed	13	14	13	15	13
84	S4R460	IGHV3OR16-9	Immunoglobulin heavy variable 3/OR16-9 (non-functional)	unreviewed	5	6	6	6	7
85	P04264	KRT1 KRTA	Keratin, type II cytoskeletal 1 (67 kDa cytokeratin) (Cytokeratin-1) (CK-1) (Hair alpha protein) (Keratin-1) (K1) (Type-II keratin Kb1)	reviewed	6	5	61	15	5
86	P69905	HBA1; HBA2	Hemoglobin subunit alpha (Alpha-globin) (Hemoglobin alpha chain)	reviewed	12	11	6	11	8
87	Q5VY30	RBP4 hCG_37964	Retinol-binding protein	unreviewed	11	10	13	17	6
88	P07360	C8G	Complement component C8 gamma chain	reviewed	7	8	3	10	11
89	P27918	CFP PFC	Properdin (Complement factor P)	reviewed	4	6	4	6	3
90	P00748	F12	Coagulation factor XII (EC 3.4.21.38) (Hageman factor) (HAF) [Cleaved into: Coagulation factor XIIa heavy chain; Beta-factor XIIa part 1; Coagulation factor XIIa light chain (Beta-factor XIIa part 2)]	reviewed	6	11	4	6	6
91	P29622	SERPINA4 KST PI4	Kallistatin (Kallikrein inhibitor) (Peptidase inhibitor 4) (PI-4) (Serpin A4)	reviewed	2	9	1	9	1
92	P27169	PON1 PON	Serum paraoxonase/arylesterase 1 (PON 1) (EC 3.1.1.2) (EC 3.1.1.81) (EC 3.1.8.1) (Aromatic esterase 1) (A-esterase 1) (K-45) (Serum aryldialkylphosphatase 1)	reviewed	7	9	4	8	5
93	P02747	C1QC C1QG	Complement C1q subcomponent subunit C	reviewed	5	6	4	8	5
94	A0A0A0MSV6	C1QB	Complement C1q subcomponent subunit B (Fragment)	unreviewed	11	8	5	9	8
95	O75882	ATRN KIAA0548 MGCA	Attractin (DPPT-L) (Mahogany homolog)	reviewed	6	5	8	7	10
96	V9GYE7	CFHR2	Complement factor H-related protein 2	unreviewed	0	0	1	1	0
97	E9PQD6	SAA1	Serum amyloid A protein	unreviewed	0	0	0	0	35
98	P01019	AGT SERPINA8	Angiotensinogen (Serpin A8) [Cleaved into: Angiotensin-1 (Angiotensin 1-10) (Angiotensin I) (Ang I); Angiotensin-2 (Angiotensin 1-8) (Angiotensin II) (Ang II); Angiotensin-3 (Angiotensin 2-8) (Angiotensin III) (Ang III) (Des-Asp[1]-angiotensin II); Angiotensin-4 (Angiotensin 3-8) (Angiotensin IV) (Ang IV); Angiotensin 1-9; Angiotensin 1-7; Angiotensin 1-5; Angiotensin 1-4]	reviewed	6	6	3	8	8
99	E9PDZ0	C2	Complement C2 (Fragment)	unreviewed	0	0	0	0	0
100	O95445	APOM G3A NG20 HSPC336	Apolipoprotein M (Apo-M) (ApoM) (Protein G3a)	reviewed	12	11	0	10	0
101	P35527	KRT9	Keratin, type I cytoskeletal 9 (Cytokeratin-9) (CK-9) (Keratin-9) (K9)	reviewed	0	1	48	3	0
102	Q14520	HABP2 HGFAL PHBP	Hyaluronan-binding protein 2 (EC 3.4.21.-) (Factor VII-activating protease) (Factor seven-activating protease) (FSAP) (Hepatocyte growth factor activator-like protein) (Plasma hyaluronan-binding protein) [Cleaved into: Hyaluronan-binding protein 2 50 kDa heavy chain; Hyaluronan-binding protein 2 50 kDa heavy chain alternate form; Hyaluronan-binding protein 2 27 kDa light chain; Hyaluronan-binding…	reviewed	7	5	3	10	2
103	A0A075B6I0	IGLV8-61	Immunoglobulin lambda variable 8-61	reviewed	2	1	1	3	4
104	P23142	FBLN1 PP213	Fibulin-1 (FIBL-1)	reviewed	9	7	13	18	8
105	E9PHK0	CLEC3B	Tetranectin	unreviewed	2	2	1	4	0
106	A0A087WV45	TTR	Transthyretin	unreviewed	7	0	2	6	3
107	B1AHL2	FBLN1	Fibulin-1	unreviewed	0	6	9	15	7
108	P01619	IGKV3-20	Immunoglobulin kappa variable 3-20 (Ig kappa chain V-III region B6) (Ig kappa chain V-III region GOL) (Ig kappa chain V-III region HAH) (Ig kappa chain V-III region HIC) (Ig kappa chain V-III region IARC/BL41) (Ig kappa chain V-III region NG9) (Ig kappa chain V-III region SIE) (Ig kappa chain V-III region Ti) (Ig kappa chain V-III region WOL)	reviewed	1	1	0	2	1
109	A0A075B6K5	IGLV3-9	Immunoglobulin lambda variable 3-9	reviewed	0	0	0	6	0
110	P20851	C4BPB	C4b-binding protein beta chain	reviewed	3	1	1	2	1
111	P0DJI9	SAA2	Serum amyloid A-2 protein (SAA2)	reviewed	23	0	1	0	52
112	P60709	ACTB	Actin, cytoplasmic 1 (Beta-actin) [Cleaved into: Actin, cytoplasmic 1, N-terminally processed]	reviewed	0	0	0	4	0
113	P01624	IGKV3-15	Immunoglobulin kappa variable 3-15 (Ig kappa chain V-III region CLL) (Ig kappa chain V-III region POM)	reviewed	0	1	0	0	0
114	A0A0A0MRZ8	IGKV3D-11	Immunoglobulin kappa variable 3D-11	reviewed	0	0	1	2	3
115	P02743	APCS PTX2	Serum amyloid P-component (SAP) (9.5S alpha-1-glycoprotein) [Cleaved into: Serum amyloid P-component(1-203)]	reviewed	2	3	2	3	1
116	A0A0B4J1X5	IGHV3-74	Immunoglobulin heavy variable 3-74	reviewed	0	4	0	0	0
117	X6RLJ0	C1QA	Complement C1q subcomponent subunit A (Fragment)	unreviewed	3	4	2	2	3
118	P51884	LUM LDC SLRR2D	Lumican (Keratan sulfate proteoglycan lumican) (KSPG lumican)	reviewed	2	7	2	6	2
119	Q6P163	APOC2	APOC2 protein (Apolipoprotein C-II)	unreviewed	1	0	1	4	1
120	P06310	IGKV2-30	Immunoglobulin kappa variable 2-30 (Ig kappa chain V-II region RPMI 6410)	reviewed	0	0	2	1	1
121	P15169	CPN1 ACBP	Carboxypeptidase N catalytic chain (CPN) (EC 3.4.17.3) (Anaphylatoxin inactivator) (Arginine carboxypeptidase) (Carboxypeptidase N polypeptide 1) (Carboxypeptidase N small subunit) (Kininase-1) (Lysine carboxypeptidase) (Plasma carboxypeptidase B) (Serum carboxypeptidase N) (SCPN)	reviewed	4	2	1	4	3
122	A0A0C4DH42	IGHV3-66	Immunoglobulin heavy variable 3-66	reviewed	0	0	0	0	0
123	A0A075B6I4	IGLV10-54	Immunoglobulin lambda variable 10-54	reviewed	2	0	2	0	4
124	P35908	KRT2 KRT2A KRT2E	Keratin, type II cytoskeletal 2 epidermal (Cytokeratin-2e) (CK-2e) (Epithelial keratin-2e) (Keratin-2 epidermis) (Keratin-2e) (K2e) (Type-II keratin Kb2)	reviewed	0	0	29	3	2
125	P35858	IGFALS ALS	Insulin-like growth factor-binding protein complex acid labile subunit (ALS)	reviewed	2	3	2	6	0
126	P00746	CFD DF PFD	Complement factor D (EC 3.4.21.46) (Adipsin) (C3 convertase activator) (Properdin factor D)	reviewed	1	1	1	2	1
127	A0A182DWH7	SELENOP	Selenoprotein P (Fragment)	unreviewed	2	2	0	3	0
128	P01717	IGLV3-25	Immunoglobulin lambda variable 3-25 (Ig lambda chain V-IV region Hil)	reviewed	0	0	1	1	1
129	P11226	MBL2 COLEC1 MBL	Mannose-binding protein C (MBP-C) (Collectin-1) (MBP1) (Mannan-binding protein) (Mannose-binding lectin)	reviewed	2	3	0	3	0
130	P01780	IGHV3-7	Immunoglobulin heavy variable 3-7 (Ig heavy chain V-III region GAL) (Ig heavy chain V-III region GAR) (Ig heavy chain V-III region JON)	reviewed	0	0	0	0	0
131	Q04756	HGFAC	Hepatocyte growth factor activator (HGF activator) (HGFA) (EC 3.4.21.-) [Cleaved into: Hepatocyte growth factor activator short chain; Hepatocyte growth factor activator long chain]	reviewed	3	0	0	1	0
132	A0A0C4DH25	IGKV3D-20	Immunoglobulin kappa variable 3D-20	reviewed	0	1	0	1	1
133	A0A087WSY5	CPB2	Carboxypeptidase B2	unreviewed	1	2	1	3	4
134	P00740	F9	Coagulation factor IX (EC 3.4.21.22) (Christmas factor) (Plasma thromboplastin component) (PTC) [Cleaved into: Coagulation factor IXa light chain; Coagulation factor IXa heavy chain]	reviewed	3	3	1	3	2
135	Q5JVE8	F10	Coagulation factor X	unreviewed	2	0	0	0	1
136	P22792	CPN2 ACBP	Carboxypeptidase N subunit 2 (Carboxypeptidase N 83 kDa chain) (Carboxypeptidase N large subunit) (Carboxypeptidase N polypeptide 2) (Carboxypeptidase N regulatory subunit)	reviewed	1	2	0	2	1
137	P04070	PROC	Vitamin K-dependent protein C (EC 3.4.21.69) (Anticoagulant protein C) (Autoprothrombin IIA) (Blood coagulation factor XIV) [Cleaved into: Vitamin K-dependent protein C light chain; Vitamin K-dependent protein C heavy chain; Activation peptide]	reviewed	2	2	0	0	0
138	A0A0C4DH38	IGHV5-51	Immunoglobulin heavy variable 5-51	reviewed	0	0	0	0	0
139	I3L4B9	SHBG	Sex hormone-binding globulin	unreviewed	0	0	0	0	1
140	A0A0C4DH31	IGHV1-18	Immunoglobulin heavy variable 1-18	reviewed	0	0	0	0	0
141	P01699	IGLV1-44	Immunoglobulin lambda variable 1-44 (Ig lambda chain V-I region MEM) (Ig lambda chain V-I region VOR)	reviewed	0	0	0	0	3
142	A0A087X0Q4	IGKV2-40 IGKV2D-40	Immunoglobulin kappa variable 2-40 (Immunoglobulin kappa variable 2D-40)	unreviewed	1	2	0	1	1
143	A0A075B6R9	IGKV2D-24	Immunoglobulin kappa variable 2D-24 (non-functional) (Fragment)	unreviewed	0	0	0	0	0
144	D6RFL4	CD14	Monocyte differentiation antigen CD14 (Fragment)	unreviewed	0	0	0	0	0
145	Q16610	ECM1	Extracellular matrix protein 1 (Secretory component p85)	reviewed	0	1	2	1	0
146	P26927	MST1 D3F15S2 DNF15S2 HGFL	Hepatocyte growth factor-like protein (Macrophage stimulatory protein) (Macrophage-stimulating protein) (MSP) [Cleaved into: Hepatocyte growth factor-like protein alpha chain; Hepatocyte growth factor-like protein beta chain]	reviewed	1	1	1	2	1
147	P01602	IGKV1-5	Immunoglobulin kappa variable 1-5 (Ig kappa chain V-I region CAR) (Ig kappa chain V-I region EU) (Ig kappa chain V-I region HK102) (Ig kappa chain V-I region Kue)	reviewed	1	0	1	1	1
148	P08185	SERPINA6 CBG	Corticosteroid-binding globulin (CBG) (Serpin A6) (Transcortin)	reviewed	3	3	1	2	4
149	P01704	IGLV2-14	Immunoglobulin lambda variable 2-14 (Ig lambda chain V-II region NIG-84) (Ig lambda chain V-II region TOG) (Ig lambda chain V-II region VIL)	reviewed	0	0	0	0	1
150	P05160	F13B	Coagulation factor XIII B chain (Fibrin-stabilizing factor B subunit) (Protein-glutamine gamma-glutamyltransferase B chain) (Transglutaminase B chain)	reviewed	0	0	0	0	0
151	P01714	IGLV3-19	Immunoglobulin lambda variable 3-19 (Ig lambda chain V-III region SH)	reviewed	1	1	0	1	1
152	A6NMB1	SIGLEC16 SIGLECP16	Sialic acid-binding Ig-like lectin 16 (Siglec-16) (Siglec-P16)	reviewed	0	0	0	0	0
153	H7C2A0	GK	Glycerol kinase (Fragment)	unreviewed	0	0	0	0	0
154	O75636	FCN3 FCNH HAKA1	Ficolin-3 (Collagen/fibrinogen domain-containing lectin 3 p35) (Collagen/fibrinogen domain-containing protein 3) (Hakata antigen)	reviewed	1	0	0	0	0
155	P02763	ORM1 AGP1	Alpha-1-acid glycoprotein 1 (AGP 1) (Orosomucoid-1) (OMD 1)	reviewed	3	0	0	0	4
156	A0A075B7D0	IGHV1OR15-1	Immunoglobulin heavy variable 1/OR15-1 (non-functional) (Fragment)	unreviewed	1	0	1	1	0
157	A0A0U1RQV3	EFEMP1	EGF-containing fibulin-like extracellular matrix protein 1 (Fragment)	unreviewed	0	0	2	2	4
158	P12259	F5	Coagulation factor V (Activated protein C cofactor) (Proaccelerin, labile factor) [Cleaved into: Coagulation factor V heavy chain; Coagulation factor V light chain]	reviewed	0	0	0	0	0
159	A0A075B6I9	IGLV7-46	Immunoglobulin lambda variable 7-46	reviewed	0	0	1	1	1
160	P01344	IGF2 PP1446	Insulin-like growth factor II (IGF-II) (Somatomedin-A) (T3M-11-derived growth factor) [Cleaved into: Insulin-like growth factor II; Insulin-like growth factor II Ala-25 Del; Preptin]	reviewed	0	0	0	0	0
161	P02775	PPBP CTAP3 CXCL7 SCYB7 TGB1 THBGB1	Platelet basic protein (PBP) (C-X-C motif chemokine 7) (Leukocyte-derived growth factor) (LDGF) (Macrophage-derived growth factor) (MDGF) (Small-inducible cytokine B7) [Cleaved into: Connective tissue-activating peptide III (CTAP-III) (LA-PF4) (Low-affinity platelet factor IV); TC-2; Connective tissue-activating peptide III(1-81) (CTAP-III(1-81)); Beta-thromboglobulin (Beta-TG); Neutrophil-activa…	reviewed	0	0	0	0	3
162	A0A1B0GWE0	DOCK7	Dedicator of cytokinesis protein 7 (Fragment)	unreviewed	0	0	0	0	0
163	O43432	EIF4G3	Eukaryotic translation initiation factor 4 gamma 3 (eIF-4-gamma 3) (eIF-4G 3) (eIF4G 3) (eIF-4-gamma II) (eIF4GII)	reviewed	0	0	0	0	0
164	Q14517	FAT1 CDHF7 FAT	Protocadherin Fat 1 (Cadherin family member 7) (Cadherin-related tumor suppressor homolog) (Protein fat homolog) [Cleaved into: Protocadherin Fat 1, nuclear form]	reviewed	1	0	0	0	1
165	K7ERI9	APOC1	Apolipoprotein C-I (Fragment)	unreviewed	5	3	3	9	4
166	F8W062	PLA2G1B	Phospholipase A(2) (EC 3.1.1.4)	unreviewed	1	1	1	0	0
167	P04180	LCAT	Phosphatidylcholine-sterol acyltransferase (EC 2.3.1.43) (Lecithin-cholesterol acyltransferase) (Phospholipid-cholesterol acyltransferase)	reviewed	0	0	0	0	0
168	P56705	WNT4 UNQ426/PRO864	Protein Wnt-4	reviewed	0	0	0	0	0
169	P01718	IGLV3-27	Immunoglobulin lambda variable 3-27 (Ig lambda chain V-IV region Kern)	reviewed	0	0	0	0	0
170	A0A0U1RR20	PRG4	Proteoglycan 4	unreviewed	0	0	1	4	0
171	M0R151	KLK11 TLSP	Kallikrein related peptidase 11 isoform 5 transcript variant 7 (Kallikrein-11)	unreviewed	0	0	0	0	0
172	C9JXI9	KRIT1	Krev interaction trapped protein 1 (Fragment)	unreviewed	1	1	1	1	1
173	E9PNP0	ODF2L	Outer dense fiber protein 2-like (Fragment)	unreviewed	0	0	0	0	0
174	O00187	MASP2	Mannan-binding lectin serine protease 2 (EC 3.4.21.104) (MBL-associated serine protease 2) (Mannose-binding protein-associated serine protease 2) (MASP-2) [Cleaved into: Mannan-binding lectin serine protease 2 A chain; Mannan-binding lectin serine protease 2 B chain]	reviewed	0	0	0	0	0
175	Q15166	PON3	Serum paraoxonase/lactonase 3 (EC 3.1.1.2) (EC 3.1.1.81) (EC 3.1.8.1)	reviewed	0	0	0	0	0
176	A0A0B4J1U7	IGHV6-1	Immunoglobulin heavy variable 6-1	reviewed	1	1	1	0	1
177	P55056	APOC4	Apolipoprotein C-IV (Apo-CIV) (ApoC-IV) (Apolipoprotein C4)	reviewed	2	1	0	1	0
178	A0A087WWA3	KIF1B	Kinesin-like protein KIF1B	unreviewed	0	0	0	0	0
179	Q6EMK4	VASN SLITL2 UNQ314/PRO357/PRO1282	Vasorin (Protein slit-like 2)	reviewed	0	0	0	0	1
180	O76096	CST7	Cystatin-F (Cystatin-7) (Cystatin-like metastasis-associated protein) (CMAP) (Leukocystatin)	reviewed	0	1	0	0	0
181	Q9BQ31	KCNS3	Potassium voltage-gated channel subfamily S member 3 (Delayed-rectifier K(+) channel alpha subunit 3) (Voltage-gated potassium channel subunit Kv9.3)	reviewed	0	0	0	0	0
182	Q8NFU5	IPMK IMPK	Inositol polyphosphate multikinase (EC 2.7.1.151) (Inositol 1,3,4,6-tetrakisphosphate 5-kinase)	reviewed	0	1	0	0	1
183	P01833	PIGR	Polymeric immunoglobulin receptor (PIgR) (Poly-Ig receptor) (Hepatocellular carcinoma-associated protein TB6) [Cleaved into: Secretory component]	reviewed	0	0	0	1	7
184	P18859	ATP5J ATP5A ATPM	ATP synthase-coupling factor 6, mitochondrial (ATPase subunit F6)	reviewed	0	0	0	0	0
185	E9PG08	FETUB	Fetuin-B	unreviewed	1	0	1	0	1
186	Q5TB12	CIART C1orf51 hCG_1780614 RP4-790G17.5-003	Chromosome 1 open reading frame 51 (Chromosome 1 open reading frame 51, isoform CRA_c) (Circadian-associated transcriptional repressor)	unreviewed	1	0	0	0	1
187	H7BZR8	SESTD1	SEC14 domain and spectrin repeat-containing protein 1 (Fragment)	unreviewed	0	0	0	0	0
188	H0Y867	GOLGB1	Golgin subfamily B member 1 (Fragment)	unreviewed	0	0	0	0	0
189	C9JBS6	RAPGEF5	Rap guanine nucleotide exchange factor 5 (Fragment)	unreviewed	0	0	1	0	0
190	E5RFX7	PLPBP	Pyridoxal phosphate homeostasis protein (Fragment)	unreviewed	0	0	0	0	0
191	E7ENZ3	CCT5	T-complex protein 1 subunit epsilon	unreviewed	0	0	0	0	0
192	G3V1P2	TTC39C C18orf17 hCG_38321	Chromosome 18 open reading frame 17, isoform CRA_c (Tetratricopeptide repeat protein 39C)	unreviewed	0	0	0	0	0
193	G3V220	TCERG1 hCG_38116	Transcription elongation regulator 1 (Transcription elongation regulator 1, isoform CRA_c)	unreviewed	0	0	0	0	0
194	J3QKM0	ARHGAP28	Rho GTPase-activating protein 28 (Fragment)	unreviewed	0	0	0	0	2
195	J3QRV5	LLGL2	Lethal(2) giant larvae protein homolog 2	unreviewed	0	0	0	0	0
196	Q5VYK3	ECPAS ECM29 KIAA0368	Proteasome adapter and scaffold protein ECM29 (Ecm29 proteasome adapter and scaffold) (Proteasome-associated protein ECM29 homolog)	reviewed	0	0	0	0	0
197	A0A0C4DH43	IGHV2-70D	Immunoglobulin heavy variable 2-70D	reviewed	0	0	0	0	0
198	P01701	IGLV1-51	Immunoglobulin lambda variable 1-51 (Ig lambda chain V-I region BL2) (Ig lambda chain V-I region EPS) (Ig lambda chain V-I region NEW) (Ig lambda chain V-I region NIG-64)	reviewed	0	0	0	2	1
199	D6RF35	GC	Vitamin D-binding protein	unreviewed	87	71	71	98	73
200	P0CG04	IGLC1	Immunoglobulin lambda constant 1 (Ig lambda chain C region MGC) (Ig lambda-1 chain C region)	reviewed	20	0	18	0	0
201	F5GY80	C8B	Complement component C8 beta chain	unreviewed	17	14	0	13	10
202	P35542	SAA4 CSAA	Serum amyloid A-4 protein (Constitutively expressed serum amyloid A protein) (C-SAA)	reviewed	0	9	11	0	0
203	B4DQI1	C2	Complement C2 (cDNA FLJ54376, highly similar to Complement C2 (EC 3.4.21.43))	unreviewed	0	5	5	0	0
204	A6NL76	ACTA1	Actin, alpha skeletal muscle	unreviewed	0	0	0	0	0
205	E9PAQ1	CFP	Properdin	unreviewed	0	0	0	0	0
206	Q12805	EFEMP1 FBLN3 FBNL	EGF-containing fibulin-like extracellular matrix protein 1 (Extracellular protein S1-5) (Fibrillin-like protein) (Fibulin-3) (FIBL-3)	reviewed	0	0	0	0	0
207	Q96Q89	KIF20B KRMP1 MPHOSPH1	Kinesin-like protein KIF20B (Cancer/testis antigen 90) (CT90) (Kinesin family member 20B) (Kinesin-related motor interacting with PIN1) (M-phase phosphoprotein 1) (MPP1)	reviewed	0	0	0	1	0
208	P07996	THBS1 TSP TSP1	Thrombospondin-1	reviewed	0	0	0	0	2
209	P80108	GPLD1 PIGPLD1	Phosphatidylinositol-glycan-specific phospholipase D (PI-G PLD) (EC 3.1.4.50) (Glycoprotein phospholipase D) (Glycosyl-phosphatidylinositol-specific phospholipase D) (GPI-PLD) (GPI-specific phospholipase D)	reviewed	0	2	1	3	0
210	C9JSN9	BTD	Biotinidase (Fragment)	unreviewed	0	0	0	0	0
211	A0A075B6K2	IGLV3-12	Immunoglobulin lambda variable 3-12	reviewed	0	0	0	0	0
212	P01709	IGLV2-8	Immunoglobulin lambda variable 2-8 (Ig lambda chain V-II region BO) (Ig lambda chain V-II region MGC)	reviewed	0	0	0	0	1
213	P04275	VWF F8VWF	von Willebrand factor (vWF) [Cleaved into: von Willebrand antigen 2 (von Willebrand antigen II)]	reviewed	0	0	0	0	0
214	F8W0C6	KRT5	Keratin, type II cytoskeletal 5 (Fragment)	unreviewed	0	0	0	0	0
215	A0A075B6H9	IGLV4-69	Immunoglobulin lambda variable 4-69	reviewed	1	0	1	0	1
216	K7EQT9	LGALS3BP	Galectin-3-binding protein	unreviewed	0	0	0	0	0
217	Q9UGM3	DMBT1 GP340	Deleted in malignant brain tumors 1 protein (Glycoprotein 340) (Gp-340) (Hensin) (Salivary agglutinin) (SAG) (Surfactant pulmonary-associated D-binding protein)	reviewed	2	2	0	0	0
218	Q15485	FCN2 FCNL	Ficolin-2 (37 kDa elastin-binding protein) (Collagen/fibrinogen domain-containing protein 2) (EBP-37) (Ficolin-B) (Ficolin-beta) (Hucolin) (L-ficolin) (Serum lectin p35)	reviewed	0	0	0	0	0
219	C9JR62	CCDC141	Coiled-coil domain-containing protein 141 (Fragment)	unreviewed	0	0	0	0	0
220	Q8TAE7	KCNG3	Potassium voltage-gated channel subfamily G member 3 (Voltage-gated potassium channel subunit Kv10.1) (Voltage-gated potassium channel subunit Kv6.3)	reviewed	0	0	0	0	0
221	A0A075B7E8	IGHV3OR16-13	Immunoglobulin heavy variable 3/OR16-13 (non-functional) (Fragment)	unreviewed	0	0	0	0	0
222	Q9Y4D1	DAAM1 KIAA0666	Disheveled-associated activator of morphogenesis 1	reviewed	0	0	0	0	0
223	Q5SQQ9	VAX1	Ventral anterior homeobox 1	reviewed	0	0	0	0	0
224	E9PC84	TNC	Tenascin	unreviewed	0	0	0	0	0
225	K7EK09	AFMID	Kynurenine formamidase	unreviewed	0	0	0	0	0
226	C9JVB6	TRMT10C	tRNA methyltransferase 10 homolog C (Fragment)	unreviewed	1	0	0	0	0
227	A0A0C4DGB7	ACSL4	Long-chain-fatty-acid--CoA ligase 4 (Fragment)	unreviewed	0	0	0	0	0
228	E7EPN9	PRRC2C	Protein PRRC2C	unreviewed	0	0	0	0	0
229	H0YJB5	RALGAPA1	Ral GTPase-activating protein subunit alpha-1 (Fragment)	unreviewed	0	0	0	0	0
230	J3KP30	DNTTIP2	Deoxynucleotidyltransferase terminal-interacting protein 2	unreviewed	0	0	0	0	0
231	P01880	IGHD	Immunoglobulin heavy constant delta (Ig delta chain C region) (Ig delta chain C region NIG-65) (Ig delta chain C region WAH)	reviewed	1	1	0	0	0
232	A0A087WWP4	RBM15	Putative RNA-binding protein 15	unreviewed	0	0	0	0	0
233	P02538	KRT6A K6A KRT6D	Keratin, type II cytoskeletal 6A (Cytokeratin-6A) (CK-6A) (Cytokeratin-6D) (CK-6D) (Keratin-6A) (K6A) (Type-II keratin Kb6) (allergen Hom s 5)	reviewed	0	0	0	0	0
234	P04259	KRT6B K6B KRTL1	Keratin, type II cytoskeletal 6B (Cytokeratin-6B) (CK-6B) (Keratin-6B) (K6B) (Type-II keratin Kb10)	reviewed	0	0	0	0	0
235	P13647	KRT5	Keratin, type II cytoskeletal 5 (58 kDa cytokeratin) (Cytokeratin-5) (CK-5) (Keratin-5) (K5) (Type-II keratin Kb5)	reviewed	0	0	12	0	0
236	Q04695	KRT17	Keratin, type I cytoskeletal 17 (39.1) (Cytokeratin-17) (CK-17) (Keratin-17) (K17)	reviewed	0	0	0	0	0
237	P08779	KRT16 KRT16A	Keratin, type I cytoskeletal 16 (Cytokeratin-16) (CK-16) (Keratin-16) (K16)	reviewed	0	0	0	0	0
238	P13645	KRT10 KPP	Keratin, type I cytoskeletal 10 (Cytokeratin-10) (CK-10) (Keratin-10) (K10)	reviewed	4	3	20	7	4
239	P02533	KRT14	Keratin, type I cytoskeletal 14 (Cytokeratin-14) (CK-14) (Keratin-14) (K14)	reviewed	0	0	3	0	0
240	P31151	S100A7 PSOR1 S100A7C	Protein S100-A7 (Psoriasin) (S100 calcium-binding protein A7)	reviewed	0	0	0	0	0
241	P27482	CALML3	Calmodulin-like protein 3 (CaM-like protein) (CLP) (Calmodulin-related protein NB-1)	reviewed	0	0	0	0	0
242	A0A087X0I2	CFI	Complement factor I	unreviewed	12	0	0	0	0
243	P06702	S100A9 CAGB CFAG MRP14	Protein S100-A9 (Calgranulin-B) (Calprotectin L1H subunit) (Leukocyte L1 complex heavy chain) (Migration inhibitory factor-related protein 14) (MRP-14) (p14) (S100 calcium-binding protein A9)	reviewed	0	0	0	0	0
244	P05109	S100A8 CAGA CFAG MRP8	Protein S100-A8 (Calgranulin-A) (Calprotectin L1L subunit) (Cystic fibrosis antigen) (CFAG) (Leukocyte L1 complex light chain) (Migration inhibitory factor-related protein 8) (MRP-8) (p8) (S100 calcium-binding protein A8) (Urinary stone protein band A)	reviewed	0	0	0	0	0
245	P15924	DSP	Desmoplakin (DP) (250/210 kDa paraneoplastic pemphigus antigen)	reviewed	0	0	0	0	0
246	P22528	SPRR1B	Cornifin-B (14.9 kDa pancornulin) (Small proline-rich protein IB) (SPR-IB)	reviewed	0	0	0	0	0
247	F8WB22	LZTFL1	Leucine zipper transcription factor-like protein 1	unreviewed	1	0	0	0	0
248	P04792	HSPB1 HSP27 HSP28	Heat shock protein beta-1 (HspB1) (28 kDa heat shock protein) (Estrogen-regulated 24 kDa protein) (Heat shock 27 kDa protein) (HSP 27) (Stress-responsive protein 27) (SRP27)	reviewed	0	0	0	0	0
249	E7EUT5	GAPDH	Glyceraldehyde-3-phosphate dehydrogenase	unreviewed	0	0	0	0	0
250	P00742	F10	Coagulation factor X (EC 3.4.21.6) (Stuart factor) (Stuart-Prower factor) [Cleaved into: Factor X light chain; Factor X heavy chain; Activated factor Xa heavy chain]	reviewed	0	2	0	3	0
251	P08571	CD14	Monocyte differentiation antigen CD14 (Myeloid cell-specific leucine-rich glycoprotein) (CD antigen CD14) [Cleaved into: Monocyte differentiation antigen CD14, urinary form; Monocyte differentiation antigen CD14, membrane-bound form]	reviewed	2	2	0	2	2
252	J3KRP0	CNDP1	Beta-Ala-His dipeptidase	unreviewed	0	0	0	2	0
253	Q9NZT1	CALML5 CLSP	Calmodulin-like protein 5 (Calmodulin-like skin protein)	reviewed	0	0	0	0	0
254	H0YN28	ANXA2	Annexin (Fragment)	unreviewed	0	0	0	0	0
255	P47929	LGALS7 PIG1; LGALS7B	Galectin-7 (Gal-7) (HKL-14) (PI7) (p53-induced gene 1 protein)	reviewed	0	0	0	0	0
256	B7Z2E6	YWHAZ	14-3-3 protein zeta/delta (cDNA FLJ50142, highly similar to 14-3-3 protein zeta/delta (Protein kinase Cinhibitor protein 1))	unreviewed	0	0	0	0	0
257	A0A087WVQ9	EEF1A1	Elongation factor 1-alpha 1	unreviewed	0	0	0	0	0
258	H0Y896	CFAP44	Cilia- and flagella-associated protein 44 (Fragment)	unreviewed	0	0	0	0	0
259	A0A087WSY6	IGKV3D-15	Immunoglobulin kappa variable 3D-15	reviewed	1	0	0	0	0
260	P02795	MT2A CES1 MT2	Metallothionein-2 (MT-2) (Metallothionein-2A) (Metallothionein-II) (MT-II)	reviewed	1	0	2	1	0
261	K7EPV9	TPM4	Tropomyosin alpha-4 chain (Fragment)	unreviewed	0	0	0	0	0
262	P31949	S100A11 MLN70 S100C	Protein S100-A11 (Calgizzarin) (Metastatic lymph node gene 70 protein) (MLN 70) (Protein S100-C) (S100 calcium-binding protein A11) [Cleaved into: Protein S100-A11, N-terminally processed]	reviewed	0	0	0	0	0
263	K7EMV3	H3F3B	Histone H3	unreviewed	0	0	0	0	0
264	O60814	HIST1H2BK H2BFT HIRIP1	Histone H2B type 1-K (H2B K) (HIRA-interacting protein 1)	reviewed	0	0	0	0	0
265	Q6P9F0	CCDC62	Coiled-coil domain-containing protein 62 (Protein TSP-NY) (Protein aaa)	reviewed	0	1	1	0	0
266	Q8IW00	VSTM4 C10orf72	V-set and transmembrane domain-containing protein 4 [Cleaved into: Peptide Lv]	reviewed	0	0	0	0	0
267	Q9Y2K3	MYH15 KIAA1000	Myosin-15 (Myosin heavy chain 15)	reviewed	0	0	0	0	0
268	Q9UKP6	UTS2R GPR14	Urotensin-2 receptor (UR-2-R) (G-protein coupled receptor 14) (Urotensin II receptor) (UR-II-R)	reviewed	0	0	0	0	0
269	Q9H0C2	SLC25A31 AAC4 ANT4 SFEC	ADP/ATP translocase 4 (ADP,ATP carrier protein 4) (Adenine nucleotide translocator 4) (ANT 4) (Solute carrier family 25 member 31) (Sperm flagellar energy carrier protein)	reviewed	0	0	0	0	0
270	Q8NGR8	OR1L8	Olfactory receptor 1L8 (Olfactory receptor OR9-24)	reviewed	0	0	0	0	0
271	H0Y426	VARS	Valine--tRNA ligase (Fragment)	unreviewed	0	0	0	0	0
272	F8WF57	SIRT2	NAD-dependent protein deacetylase sirtuin-2	unreviewed	0	0	0	0	0
273	A0A087WWT3	ALB	Serum albumin	unreviewed	0	0	0	0	0
274	H0YAC1	KLKB1	Plasma kallikrein (Fragment)	unreviewed	0	0	0	23	0
275	P0DJI8	SAA1	Serum amyloid A-1 protein (SAA) [Cleaved into: Amyloid protein A (Amyloid fibril protein AA); Serum amyloid protein A(2-104); Serum amyloid protein A(3-104); Serum amyloid protein A(2-103); Serum amyloid protein A(2-102); Serum amyloid protein A(4-101)]	reviewed	32	0	0	5	0
276	A0A087WYK9	CFHR3	Complement factor H-related protein 3	unreviewed	0	0	0	3	0
277	J3KP74	PRG4	Proteoglycan 4 (Fragment)	unreviewed	1	1	0	0	0
278	Q5VVP7	CRP	C-reactive protein	unreviewed	5	0	0	0	6
279	P01700	IGLV1-47	Immunoglobulin lambda variable 1-47 (Ig lambda chain V-I region HA) (Ig lambda chain V-I region WAH)	reviewed	0	0	0	0	0
280	P18428	LBP	Lipopolysaccharide-binding protein (LBP)	reviewed	2	0	0	0	3
281	U3KPR1	KRT86	Keratin, type II cuticular Hb6 (Fragment)	unreviewed	0	0	0	0	0
282	P00488	F13A1 F13A	Coagulation factor XIII A chain (Coagulation factor XIIIa) (EC 2.3.2.13) (Protein-glutamine gamma-glutamyltransferase A chain) (Transglutaminase A chain)	reviewed	0	0	1	1	0
283	C9JMX4	IGFBP3	Insulin-like growth factor-binding protein 3 (Fragment)	unreviewed	0	0	0	0	0
284	O15229	KMO	Kynurenine 3-monooxygenase (EC 1.14.13.9) (Kynurenine 3-hydroxylase)	reviewed	0	0	0	0	0
285	Q15018	ABRAXAS2 ABRO1 FAM175B KIAA0157	BRISC complex subunit Abraxas 2 (Abraxas brother protein 1) (Protein FAM175B)	reviewed	0	0	0	0	0
286	A8MQT2	GOLGA8B	Golgin subfamily A member 8B (Golgin-67)	reviewed	0	0	0	0	0
287	P11388	TOP2A TOP2	DNA topoisomerase 2-alpha (EC 5.99.1.3) (DNA topoisomerase II, alpha isozyme)	reviewed	0	0	0	0	0
288	Q9BRS2	RIOK1	Serine/threonine-protein kinase RIO1 (EC 2.7.11.1) (EC 3.6.3.-) (RIO kinase 1)	reviewed	0	0	0	0	0
289	C9JQH3	TRIM73	Tripartite motif-containing protein 73	unreviewed	0	0	0	0	0
290	D6RB32	F11	Coagulation factor XI	unreviewed	0	0	0	0	0
291	F5GYM0	CMAS	N-acylneuraminate cytidylyltransferase (Fragment)	unreviewed	0	0	0	0	0
292	H3BNQ6	UBR1	E3 ubiquitin-protein ligase UBR1	unreviewed	0	0	0	0	0
293	J3KQ66	RELN	Reelin	unreviewed	0	0	0	0	0
294	Q86YM6	HOMER1	HOMER1F (Homer protein homolog 1)	unreviewed	0	0	0	0	0
295	A0A1B0GUF4	EVI5	Ecotropic viral integration site 5 protein homolog (Fragment)	unreviewed	0	0	0	0	0
296	V9GYE3	APOA2	Apolipoprotein A-II	unreviewed	16	0	0	0	0
297	F5H2D0	C1R	Complement C1r subcomponent	unreviewed	0	0	0	0	0
298	G5E9F8	PROS1 hCG_1790803	Protein S (Alpha), isoform CRA_b (Vitamin K-dependent protein S)	unreviewed	0	0	0	0	0
299	Q5SRP5	APOM	Apolipoprotein M	unreviewed	0	0	4	0	5
300	A0A0C4DH36	IGHV3-38	Immunoglobulin heavy variable 3-38 (non-functional) (Fragment)	unreviewed	1	0	0	0	0
301	H0YFL7	C1RL	Complement C1r subcomponent-like protein (Fragment)	unreviewed	0	0	0	0	0
302	A0A0G2JRQ6		Uncharacterized protein (Fragment)	unreviewed	0	0	0	0	0
303	Q13315	ATM	Serine-protein kinase ATM (EC 2.7.11.1) (Ataxia telangiectasia mutated) (A-T mutated)	reviewed	0	0	0	0	0
304	A0A075B6H7	IGKV3-7	Immunoglobulin kappa variable 3-7 (non-functional) (Fragment)	unreviewed	0	0	0	0	1
305	A0A1B0GVE0	CNPY1	Protein canopy homolog 1	unreviewed	1	0	0	0	1
306	P02679	FGG PRO2061	Fibrinogen gamma chain	reviewed	80	0	54	0	0
307	P06681	C2	Complement C2 (EC 3.4.21.43) (C3/C5 convertase) [Cleaved into: Complement C2b fragment; Complement C2a fragment]	reviewed	10	0	0	0	9
308	Q08380	LGALS3BP M2BP	Galectin-3-binding protein (Basement membrane autoantigen p105) (Lectin galactoside-binding soluble 3-binding protein) (Mac-2-binding protein) (MAC2BP) (Mac-2 BP) (Tumor-associated antigen 90K)	reviewed	4	0	0	1	0
309	F8WCH0	ACTG2	Actin, gamma-enteric smooth muscle	unreviewed	1	1	1	0	0
310	Q6P3R8	NEK5	Serine/threonine-protein kinase Nek5 (EC 2.7.11.1) (Never in mitosis A-related kinase 5) (NimA-related protein kinase 5)	reviewed	1	0	0	0	0
311	P03951	F11	Coagulation factor XI (FXI) (EC 3.4.21.27) (Plasma thromboplastin antecedent) (PTA) [Cleaved into: Coagulation factor XIa heavy chain; Coagulation factor XIa light chain]	reviewed	2	0	0	0	0
312	P08F94	PKHD1 FCYT TIGM1	Fibrocystin (Polycystic kidney and hepatic disease 1 protein) (Polyductin) (Tigmin)	reviewed	1	0	0	0	1
313	E9PNG3	CSDE1	Cold shock domain-containing protein E1 (Fragment)	unreviewed	1	0	0	0	0
314	D6R9F9	ARSK	Arylsulfatase K	unreviewed	1	0	0	0	0
315	Q6YBV0	SLC36A4 PAT4	Proton-coupled amino acid transporter 4 (Proton/amino acid transporter 4) (Solute carrier family 36 member 4)	reviewed	1	0	0	1	0
316	Q9H6Q4	NARFL PRN	Cytosolic Fe-S cluster assembly factor NARFL (Iron-only hydrogenase-like protein 1) (IOP1) (Nuclear prelamin A recognition factor-like protein) (Protein related to Narf)	reviewed	2	0	0	0	0
317	P51608	MECP2	Methyl-CpG-binding protein 2 (MeCp-2 protein) (MeCp2)	reviewed	1	0	0	0	0
318	H0Y512	APMAP	Adipocyte plasma membrane-associated protein (Fragment)	unreviewed	1	0	0	0	0
319	E9PFZ2	CP	Ceruloplasmin	unreviewed	0	55	35	0	0
320	V9GYG9	APOA2	Apolipoprotein A-II (Fragment)	unreviewed	0	22	26	21	16
321	P01591	JCHAIN IGCJ IGJ	Immunoglobulin J chain (Joining chain of multimeric IgA and IgM)	reviewed	0	19	0	0	0
322	P02766	TTR PALB	Transthyretin (ATTR) (Prealbumin) (TBPA)	reviewed	0	11	0	0	0
323	A0A140T8Y2	GNL1	Guanine nucleotide-binding protein-like 1 (Fragment)	unreviewed	0	1	0	0	0
324	Q9C0J8	WDR33 WDC146	pre-mRNA 3' end processing protein WDR33 (WD repeat-containing protein 33) (WD repeat-containing protein WDC146)	reviewed	0	1	0	0	0
325	O43592	XPOT	Exportin-T (Exportin(tRNA)) (tRNA exportin)	reviewed	0	1	0	0	0
326	Q5SRE5	NUP188 KIAA0169	Nucleoporin NUP188 homolog (hNup188)	reviewed	0	1	0	1	0
327	H7BZF7	DDC	Aromatic-L-amino-acid decarboxylase (Fragment)	unreviewed	0	1	0	0	0
328	C9J7H8	LDHB	L-lactate dehydrogenase B chain (Fragment)	unreviewed	0	1	0	0	0
329	E9PKN0	PCF11	Pre-mRNA cleavage complex 2 protein Pcf11 (Fragment)	unreviewed	0	1	0	0	0
330	A0A0G2JQ38	MARVELD2	MARVEL domain-containing protein 2	unreviewed	0	2	0	0	0
331	Q86YZ3	HRNR S100A18	Hornerin	reviewed	0	0	3	0	0
332	A0A0J9YY99		Uncharacterized protein (Fragment)	unreviewed	0	0	2	4	2
333	A0A182DWH8	SELENOP	Selenoprotein P (Fragment)	unreviewed	0	0	1	0	0
334	Q5D862	FLG2 IFPS	Filaggrin-2 (FLG-2) (Intermediate filament-associated and psoriasis-susceptibility protein) (Ifapsoriasin)	reviewed	0	0	1	0	0
335	H9KV62	TDRD1	Tudor domain-containing protein 1	unreviewed	0	0	1	0	0
336	P35251	RFC1 RFC140	Replication factor C subunit 1 (Activator 1 140 kDa subunit) (A1 140 kDa subunit) (Activator 1 large subunit) (Activator 1 subunit 1) (DNA-binding protein PO-GA) (Replication factor C 140 kDa subunit) (RF-C 140 kDa subunit) (RFC140) (Replication factor C large subunit)	reviewed	0	0	1	0	0
337	Q8NFJ6	PROKR2 GPR73L1 PKR2	Prokineticin receptor 2 (PK-R2) (G-protein coupled receptor 73-like 1) (G-protein coupled receptor I5E) (GPR73b) (GPRg2)	reviewed	0	0	1	0	0
338	Q6ZS27	ZNF662	Zinc finger protein 662	reviewed	0	0	1	0	0
339	A0A0G2JII1	HLA-DPB1	HLA class II histocompatibility antigen, DP beta 1 chain	unreviewed	0	0	1	0	0
340	E9PM69	PSMC3	26S proteasome regulatory subunit 6A	unreviewed	0	0	4	0	0
341	H0Y6H0	KDM1B	Lysine-specific histone demethylase 1B (Fragment)	unreviewed	0	0	2	0	0
342	I3L1Q6	LCAT	Phosphatidylcholine-sterol acyltransferase (Fragment)	unreviewed	0	0	0	1	0
343	A0A0C4DH72	IGKV1-6	Immunoglobulin kappa variable 1-6	reviewed	0	0	0	1	1
344	P11217	PYGM	Glycogen phosphorylase, muscle form (EC 2.4.1.1) (Myophosphorylase)	reviewed	0	0	0	1	0
345	A0A0J9YWU9		Uncharacterized protein (Fragment)	unreviewed	0	0	0	1	0
346	H0Y485	IGFBP3	Insulin-like growth factor-binding protein 3 (Fragment)	unreviewed	0	0	0	1	0
347	A0A075B6K0	IGLV3-16	Immunoglobulin lambda variable 3-16	reviewed	0	0	0	1	0
348	Q7Z5M8	ABHD12B C14orf29	Protein ABHD12B (EC 3.-.-.-) (Abhydrolase domain-containing protein 12B) (Alpha/beta hydrolase domain-containing protein 12B)	reviewed	0	0	0	1	0
349	O94989	ARHGEF15 KIAA0915	Rho guanine nucleotide exchange factor 15 (Ephexin-5) (E5) (Vsm-RhoGEF)	reviewed	0	0	0	1	0
350	P01706	IGLV2-11	Immunoglobulin lambda variable 2-11 (Ig gamma lambda chain V-II region DOT) (Ig lambda chain V-II region BOH) (Ig lambda chain V-II region BUR) (Ig lambda chain V-II region NIG-58) (Ig lambda chain V-II region TRO) (Ig lambda chain V-II region WIN)	reviewed	0	0	0	1	0
351	P0CF74	IGLC6	Immunoglobulin lambda constant 6 (Ig lambda-6 chain C region)	reviewed	0	0	0	0	19
352	P08519	LPA	Apolipoprotein(a) (Apo(a)) (Lp(a)) (EC 3.4.21.-)	reviewed	0	0	0	0	7
353	E9PBC5	KLKB1	Plasma kallikrein	unreviewed	0	0	0	0	7
354	G5E9R0	ACTB hCG_15971	Actin, cytoplasmic 1 (HCG15971, isoform CRA_b)	unreviewed	0	0	0	0	2
355	Q9BXR6	CFHR5 CFHL5 FHR5	Complement factor H-related protein 5 (FHR-5)	reviewed	0	0	0	0	2
356	K7EQ86	KIAA0100 hCG_31795	KIAA0100, isoform CRA_a (Protein KIAA0100)	unreviewed	0	0	0	0	1
357	Q9HBJ0	PLAC1	Placenta-specific protein 1	reviewed	0	0	0	0	1
358	Q5T4F4	ZFYVE27 SPG33	Protrudin (Spastic paraplegia 33 protein) (Zinc finger FYVE domain-containing protein 27)	reviewed	0	0	0	0	1
359	P02776	PF4 CXCL4 SCYB4	Platelet factor 4 (PF-4) (C-X-C motif chemokine 4) (Iroplact) (Oncostatin-A) [Cleaved into: Platelet factor 4, short form (Endothelial cell growth inhibitor)]	reviewed	0	0	0	0	1
360	Q008S8	ECT2L C6orf91 LFDH	Epithelial cell-transforming sequence 2 oncogene-like (Lung-specific F-box and DH domain-containing protein) (Putative guanine nucleotide exchange factor LFDH)	reviewed	0	0	0	0	1
361	P30837	ALDH1B1 ALDH5 ALDHX	Aldehyde dehydrogenase X, mitochondrial (EC 1.2.1.3) (Aldehyde dehydrogenase 5) (Aldehyde dehydrogenase family 1 member B1)	reviewed	0	0	0	0	1
362	Q5JX83	HSPA12B	Heat shock 70 kDa protein 12B	unreviewed	0	0	0	0	1
363	E9PDH4	PIKFYVE	1-phosphatidylinositol 3-phosphate 5-kinase (Fragment)	unreviewed	0	0	0	0	1
364	E7EUL7	SSFA2	Sperm-specific antigen 2	unreviewed	0	0	0	0	1
365	G3V4R8	TTLL5	Tubulin polyglutamylase TTLL5	unreviewed	0	0	0	0	1
