# Supplementary material for: Multiomic analysis of a dried single-drop plasma sample using an integrated mass spectrometry approach
Source: Royal Society of Chemistry journal article supplement (doi:10.1039/d0an01149e), 2020-01-01
Supplement: d0an01149e3.xlsx [file d0an01149e3.xlsx]

## Sheet: Sheet1
No.	Accession	Adduct	m/z	Patient 1_Area	Patient 2_Area	Patient 3_Area	Patient 4_Area	Patient 5_Area	Identified by
1	WE 6:0/16:4	adduct_H	333.279	9934000	0	0	0	20690000	lipidSearch
2	PE 8:0e/8:0	adduct_H	454.293	97650000	40330000	88630000	49930000	23710000	lipidSearch
3	MG 16:0	adduct_H	331.284	9740000	4529000000	7654000	908900	91560000	lipidSearch
4	MG 16:1	adduct_NH4	346.295	9740000	0	0	0	0	lipidSearch
5	MG 9:0	adduct_(CH3CH2)3NH	348.298	967900	75.08	328900	4277000	1823000	lipidSearch
6	MG 20:4	adduct_NH4	396.311	9506000	0	0	0	8251000	lipidSearch
7	PE 8:0e/10:2	adduct_H;adduct_Na	390.321	94850000	584300000	411900000	72980000	6741000	lipidSearch
8	DG 9:0/9:0	adduct_NH4	522.355	8666000	9481000	0	10740000	9073000	lipidSearch
9	LPC 18:1	adduct_H	423.42	866400000	9966000	5132000	86050000	8872000	lipidSearch
10	MG 17:0	adduct_H;adduct_NH4	502.293	8545000	7705000	4522000	9073000	24570000	lipidSearch
11	WE 14:0/14:1	adduct_H	348.274	8423000	0	0	0	0	lipidSearch
12	LPC 20:4	adduct_H	544.34	836200000	27420000	300900000	580900000	0	lipidSearch
13	PE 8:0e/12:4	adduct_H	496.34	81070000	83350000	297300000	309900000	151800000	lipidSearch
14	DG 6:0/9:0	adduct_NH4	500.277	78350000	288300000	120300000	73480000	75320000	lipidSearch
15	LPC 16:0	adduct_H	482.324	7762000	532800000	8680000	9591000	9860000	lipidSearch
16	LPC 22:6	adduct_H	568.34	76530000	77590000	0	313800000	0	lipidSearch
17	MG 18:0	adduct_H;adduct_NH4	638.572	74270000	95840000	89640000	92130000	96610000	lipidSearch
18	MG 18:1	adduct_H;adduct_NH4	526.29	72090000	54560000	9946000	73260000	97750000	lipidSearch
19	PE 8:0p/12:4	adduct_H	346.332	7113000	13120000	9660000	49290000	10090000	lipidSearch
20	PE 8:0e/10:0	adduct_H	370.295	63110000	33020000	16070000	87100000	90960000	lipidSearch
21	LPC 20:5	adduct_H;adduct_Na	542.3241;564.3060	61770000	67760000	9536000	9493000	0	lipidSearch
22	DG 16:0/18:1	adduct_H	612.556	614600000	426000000	3.07557e+08	530500000	4.43059e+08	lipidSearch
23	PE 8:0p/10:0	adduct_H;adduct_Na	586.54	60190000	83350000	59300000	4251000	91200000	lipidSearch
24	LPE 18:1	adduct_H	480.308	60190000	0	0	0	91200000	lipidSearch
25	DG 18:1/18:1	adduct_NH4	314.233	5972000	0	0	7440000	0	lipidSearch
26	PE 8:0e/12:3	adduct_Na	290.269	55490000	58680000	43790000	91450000	0	lipidSearch
27	LPE 22:6	adduct_H	526.293	55490000	0	0	91450000	0	lipidSearch
28	So d20:0+pO	adduct_H	275.222	54820000	0	0	47050000	0	lipidSearch
29	AcCa 14:1	adduct_H	342.264	49340000	18740000	21320000	20230000	4772000	lipidSearch
30	Cer d17:0+pO/18:0+O	adduct_H	368.279	47260000	52290000	0	50360000	0	lipidSearch
31	MG 14:0	adduct_H;adduct_NH4	520.34	47250000	39720000	26780000	253900000	90510000	lipidSearch
32	AcCa 10:1	adduct_H	298.274	45050000	44000000	91650000	91120000	40680000	lipidSearch
33	So d16:0+pO	adduct_H	558.509	436900000	386200000	394900000	367200000	403800000	lipidSearch
34	MG 12:0	adduct_H	668.619	42890000	38640000	28590000	31230000	0	lipidSearch
35	AcCa 12:1	adduct_H	441.319	42260000	0	0	0	0	lipidSearch
36	AcCa 14:2	adduct_H	344.279	42060000	38190000	27150000	17670000	8631000	lipidSearch
37	LPC 18:2	adduct_H	771.647	407600000	8202000	5411000000	7992000	49200000	lipidSearch
38	MG 18:2	adduct_H;adduct_NH4	468.308	39300000	82370000	48060000	41500000	7005000	lipidSearch
39	Cer d16:0/2:0	adduct_H-H2O	257.248	350100000	254200000	260900000	395300000	378600000	lipidSearch
40	DG 16:0/14:0	adduct_NH4	358.295	34110000	28750000	22160000	38920000	0	lipidSearch
41	DG 18:0/20:1	adduct_NH4	374.363	3250000	7073000	0	5991000	0	lipidSearch
42	DG 13:0/10:4	adduct_Li	482.324	30910000	0	0	0	0	lipidSearch
43	AcCa 12:0	adduct_H	316.248	30550000	0	0	0	0	lipidSearch
44	TG 10:0/12:1/22:0	adduct_Na	426.358	303300000	57490000	0	309200000	0	lipidSearch
45	LPC 14:0	adduct_H	431.313	28370000	24400000	65630000	30770000	66770000	lipidSearch
46	WE 4:0/12:0	adduct_H	601.538	277600000	118300000	165900000	250300000	280000000	lipidSearch
47	AcCa 13:0	adduct_H	601.538	27060000	0	0	0	11660000	lipidSearch
48	So d22:0+pO	adduct_H	328.248	26670000	0	0	20040000	22620000	lipidSearch
49	LPC 15:0	adduct_H	424.342	26670000	83540000	32140000	25220000	41130000	lipidSearch
50	MG 15:0	adduct_H;adduct_NH4	614.572	25250000	28150000	29920000	36380000	23690000	lipidSearch
51	AcCa 10:0	adduct_H	614.572	251700000	106900000	118300000	165900000	235500000	lipidSearch
52	AcCa 18:1	adduct_H	234.206	23290000	13160000	15490000	29910000	35240000	lipidSearch
53	DG 10:0e/12:3	adduct_Na	494.324	22850000	61310000	23910000	0	0	lipidSearch
54	TG 12:0p/11:0/11:0	adduct_Li	311.256	220900000	215100000	0	299800000	0	lipidSearch
55	TG 12:0p/8:0/14:0	adduct_Li	572.525	220900000	0	0	299800000	0	lipidSearch
56	AcCa 11:1	adduct_H	387.31	21590000	0	0	31570000	21630000	lipidSearch
57	AcCa 18:2	adduct_H	390.321	19740000	23730000	19440000	22470000	29770000	lipidSearch
58	DG 18:0/16:0	adduct_NH4	485.29	1913000	3033000	0	9860000	0	lipidSearch
59	Cer d17:0+pO/20:0+O	adduct_H	305.248	1913000	3033000	0	9860000	0	lipidSearch
60	So d12:0+pO	adduct_H	288.217	171100000	0	0	0	0	lipidSearch
61	LPC 22:5	adduct_H	570.355	16230000	69780000	0	68890000	0	lipidSearch
62	LPC 16:1	adduct_H	169.105	15080000	9554000	27870000	56360000	30250000	lipidSearch
63	LPC 20:3	adduct_H	546.355	137100000	422300000	403500000	821200000	0	lipidSearch
64	MG 14:0e	adduct_Na	334.283	1319000	0	0	0	0	lipidSearch
65	DG 15:0/16:0	adduct_NH4	318.3	1310000	0	0	0	0	lipidSearch
66	DG 11:0/8:0	adduct_H	565.519	12030000	10470000	11790000	9972000	0	lipidSearch
67	DG 8:0/10:0	adduct_NH4	586.54	11950000	11150000	8597000	10740000	9073000	lipidSearch
68	TG 4:0/10:3/12:4	adduct_H	523.351	10830000	0	0	0	0	lipidSearch
69	WE 4:0/16:4	adduct_H	366.264	107800000	132200000	64170000	222800000	145900000	lipidSearch
70	AcCa 8:0	adduct_H	518.324	101600000	62340000	54590000	86540000	125700000	lipidSearch
71	MG 4:0	adduct_Li	482.324	0	362.7	18230	5160	9.816	lipidSearch
72	MG 8:0	adduct_(CH3CH2)3NH	352.321	0	0	0	0	0	lipidSearch
73	Betaine	adduct_H	118.086	0	0	0	0	0	MSconvertGUI
74	Phenylalanine	adduct_H	166.086	1.53673e+08	3.40542e+08	2.93375e+08	4.60942e+08	2.44691e+08	MSconvertGUI
75	Indolelactic acid	adduct_H	188.071	0	0	0	0	0	MSconvertGUI
76	Tryptophan	adduct_H	205.097	3.33371e+08	1.49693e+09	7.98928e+08	9.623e+08	4.49619e+08	MSconvertGUI
77	L-Cystathionine	adduct_H	223.076	8.06405e+06	7.50539e+06	1.37798e+07	1.3765e+07	0	MSconvertGUI
78	Fatty acid amide C14:0	adduct_H	228.232	1.24217e+09	9.5407e+08	8.5834e+08	1.15287e+09	1.00655e+09	MSconvertGUI
79	Carnitine C5:0	adduct_H	246.17	2.64375e+07	1.32603e+07	1.3837e+07	1.49932e+07	6.13841e+06	MSconvertGUI
80	Fatty acid amide C16:0	adduct_H	256.264	5.20717e+09	5.29744e+09	4.93051e+09	5.66953e+09	4.97096e+09	MSconvertGUI
81	Carnitine C6:1	adduct_H	258.17	9.1278e+08	6.8142e+08	8.67622e+08	4.67002e+08	5.79148e+08	MSconvertGUI
82	Carnitine C6:0	adduct_H	260.186	5.20423e+07	0	0	0	0	MSconvertGUI
83	Fatty acid amide C18:1	adduct_H	282.279	2.04129e+10	1.62522e+10	1.31146e+10	1.79509e+10	1.80542e+10	MSconvertGUI
84	Fatty acid amide C18:0	adduct_H	284.295	4.11069e+07	8.40597e+07	8.99249e+07	1.07419e+08	2.29939e+08	MSconvertGUI
85	Carnitine C8:1	adduct_H	286.201	4.35651e+07	1.85871e+08	4.07636e+07	2.86257e+07	1.33504e+08	MSconvertGUI
86	Palmitoylethanolamide	adduct_H	300.289	0	0	0	0	0	MSconvertGUI
87	2,6 dimethylheptanoyl carnitine	adduct_H	302.233	5.3674e+06	0	0	9.4521e+06	0	MSconvertGUI
88	Dihydrosphingosine	adduct_H	302.306	0	0	0	0	0	MSconvertGUI
89	Fatty acid amide C20:1	adduct_H	310.31	1.92694e+07	5.3476e+07	2.99114e+07	3.02803e+07	6.66302e+07	MSconvertGUI
90	Carnitine C10:2	adduct_H	312.217	1.12926e+08	9.15857e+07	6.62087e+07	0	9.07152e+07	MSconvertGUI
91	Fatty acid amide C20:0	adduct_H	312.326	780546	369714	878775	394818	0	MSconvertGUI
92	Phytosphingosine	adduct_H	318.301	0	0	0	0	0	MSconvertGUI
93	Oleoyl ethanolamide	adduct_H	326.305	9.65808e+07	1.24845e+08	6.9911e+07	2.90515e+07	5.41154e+07	MSconvertGUI
94	Fatty acid amide C22:2	adduct_H	336.326	4.58242e+08	5.44747e+08	3.65091e+08	2.23561e+08	2.61031e+08	MSconvertGUI
95	Fatty acid amide C22:1	adduct_H	338.342	1.70758e+08	1.23512e+09	1.35403e+09	1.78374e+09	1.61182e+09	MSconvertGUI
96	Carnitine C12:0	adduct_H	344.279	2.22553e+07	1.16974e+07	1.04412e+07	1.43538e+07	2.0912e+07	MSconvertGUI
97	AEA	adduct_H	348.289	0	0	0	0	0	MSconvertGUI
98	Ursodeoxycholic acid	adduct_H	357.279	0	0	0	0	0	MSconvertGUI
99	Hydrocortisone	adduct_H	363.217	7.39869e+07	2.94879e+07	6.90626e+06	3.14122e+07	1.36707e+08	MSconvertGUI
100	Carnitine C14:2	adduct_H	368.279	3.09846e+07	2.771e+07	1.96273e+07	1.6285e+07	5.07907e+07	MSconvertGUI
101	Carnitine C14:0	adduct_H	372.311	1.08532e+08	1.49364e+08	9.59133e+07	8.88057e+07	0	MSconvertGUI
102	Cholic acid	adduct_H;adduct_NH4	373.2737;390.3002	2.89445e+07	0	0	4.43848e+06	1.28318e+06	MSconvertGUI
103	MG 20:3	adduct_H	381.298	1.03663e+07	1.19643e+07	2.04299e+07	2.10239e+07	1.54025e+07	MSconvertGUI
104	Carnitine C16:1	adduct_H;adduct_Na	398.3265;420.3083	3.02255e+06	0	0	3.1073e+06	2.23622e+06	MSconvertGUI
105	7-ketocholoesterol	adduct_H	401.343	448082	1.83869e+06	1.94199e+06	8.70503e+06	510214	MSconvertGUI
106	Glycochenodeoxycholic acid	adduct_H	432.311	1.5645e+07	2.56062e+07	4.00998e+07	3.69422e+06	1.21144e+08	MSconvertGUI
107	LPE 20:3	adduct_H;adduct_Na	504.3090;526.2904	0	203700000	1.32519e+07	1.00973e+07	0	lipidSearch
108	LPC 18:0	adduct_H;adduct_Na	524.3710;546.3534	0	74180000	98260000	297900000	0	lipidSearch
109	LPE 22:5	adduct_H	528.309	7.45452e+06	2.16156e+07	8.3831e+06	2.29305e+07	6.74634e+06	MSconvertGUI
110	LPC 20:2	adduct_H;adduct_Na	548.3710;570.3534	0	0	0	29330000	0	lipidSearch
111	DG 18:1/18:2	adduct_H	636.557	683349	0	0	498700	1.98007e+06	lipidSearch
112	So d18:0+pO	adduct_H	508.34	0	87680000	74180000	86280000	86950000	lipidSearch
113	DG 10:0p/23:1	adduct_H	311.185	0	6035000	10350000	26900000	0	lipidSearch
114	DG 16:0/16:0	adduct_NH4	574.519	0	52290000	0	2613000	0	lipidSearch
115	SM d16:1+hO/4:0	adduct_H	601.538	0	51910000	37650000	0	0	lipidSearch
116	AcCa 14:3	adduct_H	482.361	0	3884000	0	0	0	lipidSearch
117	LPC 18:3	adduct_H	476.277	0	33760000	37470000	96460000	10670000	lipidSearch
118	LPE 18:0	adduct_H	506.324	0	33020000	16070000	0	37550000	lipidSearch
119	WE 6:0/16:3	adduct_NH4	319.263	0	317000000	0	0	0	lipidSearch
120	LPC 17:1	adduct_H	893.757	0	30480000	0	60990000	0	lipidSearch
121	DG 4:0/10:3	adduct_H	281.248	0	27860000	0	0	0	lipidSearch
122	Cer d16:0/21:4	adduct_H	437.435	0	2757000	0	8186000	0	lipidSearch
123	LPC 22:4	adduct_H	572.371	0	24720000	0	45580000	0	lipidSearch
124	TG 12:0p/10:0/12:0	adduct_Li	437.435	0	215100000	0	0	0	lipidSearch
125	LPC 16:0e	adduct_H	299.295	0	21180	73820000	46340	85420000	lipidSearch
126	PE 8:0e/10:3	adduct_H	299.295	0	20820000	0	0	0	lipidSearch
127	PE 8:0e/12:2	adduct_H	508.376	0	15720000	0	0	0	lipidSearch
128	WE 5:0/16:4	adduct_H	456.332	0	15390000	23280000	75030000	119000000	lipidSearch
129	LPE 18:2	adduct_H	478.293	0	141700000	405600000	0	0	lipidSearch
130	TG 19:0/10:3/24:0	adduct_Na	283.263	0	1131000	0	0	0	lipidSearch
131	WE 4:0/14:2	adduct_H	298.274	0	1083000000	0	0	0	lipidSearch
132	Carnitine C10:3	adduct_H	310.201	0	1.28956e+08	0	0	0	MSconvertGUI
133	Carnitine C12:1	adduct_H	342.264	0	1.77357e+07	1.04591e+07	2.67593e+07	3.76767e+07	MSconvertGUI
134	Sphingosine-1-phosphatb	adduct_H	380.256	0	7.09426e+06	0	3.00531e+06	0	MSconvertGUI
135	Glycoursodeoxycholic acid	adduct_H	450.321	0	0	0	0	0	MSconvertGUI
136	Glycocholic acid	adduct_H	466.316	0	4.53134e+06	0	1.63996e+07	1.84526e+07	MSconvertGUI
137	LPE 18:3	adduct_H	476.278	0	1.14283e+07	0	0	0	MSconvertGUI
138	LPC 20:1	adduct_H;adduct_Na	550.3867;572.3691	0	0	55740000	0	0	lipidSearch
139	IS-Cer d18:1/17:0	adduct_Na	574.517	0	1.85142e+06	2.03548e+06	5.68202e+06	1.27094e+07	MSconvertGUI
140	WE 14:0/15:1	adduct_H	480.345	0	0	8167000	0	0	lipidSearch
141	WE 15:0/14:1	adduct_H	516.426	0	0	8167000	0	0	lipidSearch
142	WE 3:0/16:0	adduct_H	510.355	0	0	584400000	321500000	1076000000	lipidSearch
143	WE 6:0/13:0	adduct_H	385.346	0	0	584400000	0	1076000000	lipidSearch
144	LPC 18:0p	adduct_H	197.136	0	0	52440000	0	82900000	lipidSearch
145	TG 4:0/8:0/10:2	adduct_NH4	360.311	0	0	4223000	0	7523000	lipidSearch
146	WE 4:0/14:1	adduct_H	668.619	0	0	2844000000	0	0	lipidSearch
147	WE 3:0/15:2	adduct_NH4	357.3	0	0	260900000	0	0	lipidSearch
148	LPC 16:0p	adduct_H	307.263	0	0	1758000	6970000	3963000	lipidSearch
149	TG 8:0/8:0/10:0	adduct_NH4	312.217	0	0	1609000	0	0	lipidSearch
150	LPC 17:0	adduct_H	330.264	0	0	125400000	65480000	163200000	lipidSearch
151	ZyE 0:0	adduct_H	628.374	0	0	10750000	15650000	3894000	lipidSearch
152	MG 6:0	adduct_Li	299.295	0	0	0	0	0	lipidSearch
153	Choline	adduct_H	104.107	0	0	331792	4.5661e+06	112032	MSconvertGUI
154	Hippuric acid	adduct_H	180.065	0	0	0	0	0	MSconvertGUI
155	Ubiquinone-1	adduct_NH4	268.156	0	0	9.42468e+07	0	0	MSconvertGUI
156	Phenylacetyl-glutamine	adduct_H	265.118	0	0	0	0	0	MSconvertGUI
157	MG 17:1	adduct_NH4	502.293	0	0	0	9863000	0	lipidSearch
158	DG 16:0/22:1	adduct_NH4	257.248	0	0	0	9310000	0	lipidSearch
159	DG 10:0p/8:0	adduct_H	440.314	0	0	0	67520000	0	lipidSearch
160	WE 4:0/16:3	adduct_H	299.295	0	0	0	59000000	25600000	lipidSearch
161	AcCa 10:2	adduct_H	528.308	0	0	0	4920000	0	lipidSearch
162	AcCa 11:0	adduct_H	568.337	0	0	0	4311000	0	lipidSearch
163	PE 16:0e/10:2	adduct_K	400.342	0	0	0	4241000	0	lipidSearch
164	DG 16:0/18:2	adduct_H	610.54	0	0	0	366300	1.3841e+06	lipidSearch
165	WE 5:0/14:0	adduct_H	862.625	0	0	0	321500000	0	lipidSearch
166	PE 10:0e/10:4	adduct_H	673.528	0	0	0	309900000	0	lipidSearch
167	WE 3:0/13:0	adduct_H	612.544	0	0	0	250300000	0	lipidSearch
168	LPE 16:0e	adduct_H	420.311	0	0	0	22850000	0	lipidSearch
169	WE 7:0/12:0	adduct_H	523.387	0	0	0	192000000	1076000000	lipidSearch
170	PE 8:0p/14:4	adduct_H	451.451	0	0	0	18440000	0	lipidSearch
171	MePC 8:0e/11:3	adduct_Na	451.451	0	0	0	16510000	0	lipidSearch
172	AcCa 16:0	adduct_H	458.348	0	0	0	16500000	19800000	lipidSearch
173	CerG2 d18:1/16:0	adduct_H	310.201	0	0	0	136600	0	lipidSearch
174	SM d14:1/18:1	adduct_H	318.288	0	0	0	13250000	0	lipidSearch
175	DG 16:0/11:1	adduct_(CH3CH2)3NH	305.248	0	0	0	120000000	0	lipidSearch
176	MG 22:6	adduct_NH4	383.219	0	0	0	11020000	0	lipidSearch
177	SM d13:0/8:0	adduct_H	636.557	0	0	0	0	0	lipidSearch
178	Glutamate	adduct_H	130.05	0	0	0	3.4475e+09	0	MSconvertGUI
179	Tyrosine	adduct_H	182.081	0	0	0	8.41942e+06	0	MSconvertGUI
180	Carnitine C10:1	adduct_NH4	331.259	0	0	0	2.87537e+08	0	MSconvertGUI
181	SM 32:2	adduct_H	673.529	0	0	0	2.67129e+06	0	MSconvertGUI
182	WE 12:0/18:1	adduct_H	451.451	0	0	0	0	6848000	lipidSearch
183	WE 14:0/16:1	adduct_H	451.451	0	0	0	0	6848000	lipidSearch
184	TG 4:0/8:0/10:1	adduct_NH4	458.348	0	0	0	0	4924000	lipidSearch
185	AcCa 10:3	adduct_H	310.201	0	0	0	0	42240000	lipidSearch
186	MG 8:0p	adduct_(CH3CH2)3NH	318.288	0	0	0	0	1493	lipidSearch
187	WE 3:0/17:4	adduct_H	305.248	0	0	0	0	145900000	lipidSearch
188	DG 8:0/8:0	adduct_K	383.219	0	0	0	0	13630000	lipidSearch
189	Caffeine	adduct_H	195.088	0	0	0	0	4.93354e+07	MSconvertGUI
190	DG 18:0/18:2	adduct_H	638.572	0	0	0	0	0	MSconvertGUI
